# Supplementary material for: The Premise of Interdisciplinarity and Its Actual Absence—A Bibliometric Analysis of Publications on Heavy Rainfall
Source: MDPI journal article supplement (doi:10.3390/w14193001), 2022-09-23
Supplement: s1 [file s1]

Archive with 7 entries (7 files):
- Cover_letter_v2.pdf
- SF1_NMDS_318classifications.png
- Supplement_description.pdf
- TS1_dictionary.csv
- TS2_frequency_distribution.csv
- TS3_Jac_area.csv
- TS4_Jac_classifications.csv
