# Supplementary material for: The Premise of Interdisciplinarity and Its Actual Absence—A Bibliometric Analysis of Publications on Heavy Rainfall
Source: MDPI journal article supplement (doi:10.3390/w14193001), 2022-09-23
Supplement: s1 [file s1 › Cover_letter_v2.pdf]

The here submitted manuscript fits well in the scope of MDPI water as related studies have already been published in MDPI water. In addition to that we propose a new methods for bibliometric analyses which allows for more follow-up studies.

Statements:

We confirm that neither the manuscript nor any parts of its content are currently under consideration or published in another journal

All authors have approved the manuscript and agree with its submission to (MDPI Water).
