# Supplementary material for: The Premise of Interdisciplinarity and Its Actual Absence—A Bibliometric Analysis of Publications on Heavy Rainfall
Source: MDPI journal article supplement (doi:10.3390/w14193001), 2022-09-23
Supplement: s1 [file s1 › Supplement_description.pdf]

**Table S1**

Dictionary of the existing Scopus hierarchy of individual subject areas, associated classifications abbreviations and codes.

**Table S2**

Frequency distribution of the 27 subject areas within the data corpus.

**Table S3**

Symmetric Jaccard similarity matrix of the 27 Subject Areas.

**Table S4**

Symmetric Jaccard dissimilarity matrix of the 318 Classifications

**Figure S1**

NMDS of the „Classifications“ based on their affiliation to their superordinate „Subject Areas“ and their Jaccard dissimilarities, after removing outliers to enhance the resolution, as individual single Classifications had a dissimilarity of 1 to every other „Classification“. Stressvalue: 0.0586. Point color denote the affiliation of individual „Classifications“ to „Clusters“. Orange: life sciences, pink: social sciences & humanities, blue: physical sciences, green: health sciences.
