# Supplementary material for: The Premise of Interdisciplinarity and Its Actual Absence—A Bibliometric Analysis of Publications on Heavy Rainfall
Source: MDPI journal article supplement (doi:10.3390/w14193001), 2022-09-23
Supplement: s1 [file s1 › TS1_dictionary.csv]

subject cluster	subject area	subject code	subject classification	abbreviation
Health Sciences	Multidisciplinary	1000	Multidisciplinary	MULT
Life Sciences	Agricultural and Biological Sciences	1100	Agricultural and Biological Sciences (all)	AGRI
Life Sciences	Agricultural and Biological Sciences	1101	Agricultural and Biological Sciences (miscellaneous)	AGRI
Life Sciences	Agricultural and Biological Sciences	1102	Agronomy and Crop Science	AGRI
Life Sciences	Agricultural and Biological Sciences	1103	Animal Science and Zoology	AGRI
Life Sciences	Agricultural and Biological Sciences	1104	Aquatic Science	AGRI
Life Sciences	Agricultural and Biological Sciences	1105	Ecology, Evolution, Behavior and Systematics	AGRI
Life Sciences	Agricultural and Biological Sciences	1106	Food Science	AGRI
Life Sciences	Agricultural and Biological Sciences	1107	Forestry	AGRI
Life Sciences	Agricultural and Biological Sciences	1108	Horticulture	AGRI
Life Sciences	Agricultural and Biological Sciences	1109	Insect Science	AGRI
Life Sciences	Agricultural and Biological Sciences	1110	Plant Science	AGRI
Life Sciences	Agricultural and Biological Sciences	1111	Soil Science	AGRI
Social Sciences & Humanities	Arts and Humanities	1200	Arts and Humanities (all)	ARTS
Social Sciences & Humanities	Arts and Humanities	1201	Arts and Humanities (miscellaneous)	ARTS
Social Sciences & Humanities	Arts and Humanities	1202	History	ARTS
Social Sciences & Humanities	Arts and Humanities	1203	Language and Linguistics	ARTS
Social Sciences & Humanities	Arts and Humanities	1204	Archeology (arts and humanities)	ARTS
Social Sciences & Humanities	Arts and Humanities	1205	Classics	ARTS
Social Sciences & Humanities	Arts and Humanities	1206	Conservation	ARTS
Social Sciences & Humanities	Arts and Humanities	1207	History and Philosophy of Science	ARTS
Social Sciences & Humanities	Arts and Humanities	1208	Literature and Literary Theory	ARTS
Social Sciences & Humanities	Arts and Humanities	1209	Museology	ARTS
Social Sciences & Humanities	Arts and Humanities	1210	Music	ARTS
Social Sciences & Humanities	Arts and Humanities	1211	Philosophy	ARTS
Social Sciences & Humanities	Arts and Humanities	1212	Religious Studies	ARTS
Social Sciences & Humanities	Arts and Humanities	1213	Visual Arts and Performing Arts	ARTS
Life Sciences	Biochemistry, Genetics and Molecular Biology	1300	Biochemistry, Genetics and Molecular Biology (all)	BIOC
Life Sciences	Biochemistry, Genetics and Molecular Biology	1301	Biochemistry, Genetics and Molecular Biology (miscellaneous)	BIOC
Life Sciences	Biochemistry, Genetics and Molecular Biology	1302	Aging	BIOC
Life Sciences	Biochemistry, Genetics and Molecular Biology	1303	Biochemistry	BIOC
Life Sciences	Biochemistry, Genetics and Molecular Biology	1304	Biophysics	BIOC
Life Sciences	Biochemistry, Genetics and Molecular Biology	1305	Biotechnology	BIOC
Life Sciences	Biochemistry, Genetics and Molecular Biology	1306	Cancer Research	BIOC
Life Sciences	Biochemistry, Genetics and Molecular Biology	1307	Cell Biology	BIOC
Life Sciences	Biochemistry, Genetics and Molecular Biology	1308	Clinical Biochemistry	BIOC
Life Sciences	Biochemistry, Genetics and Molecular Biology	1309	Developmental Biology	BIOC
Life Sciences	Biochemistry, Genetics and Molecular Biology	1310	Endocrinology	BIOC
Life Sciences	Biochemistry, Genetics and Molecular Biology	1311	Genetics	BIOC
Life Sciences	Biochemistry, Genetics and Molecular Biology	1312	Molecular Biology	BIOC
Life Sciences	Biochemistry, Genetics and Molecular Biology	1313	Molecular Medicine	BIOC
Life Sciences	Biochemistry, Genetics and Molecular Biology	1314	Physiology	BIOC
Life Sciences	Biochemistry, Genetics and Molecular Biology	1315	Structural Biology	BIOC
Social Sciences & Humanities	Business, Management and Accounting	1400	Business, Management and Accounting (all)	BUSI
Social Sciences & Humanities	Business, Management and Accounting	1401	Business, Management and Accounting (miscellaneous)	BUSI
Social Sciences & Humanities	Business, Management and Accounting	1402	Accounting	BUSI
Social Sciences & Humanities	Business, Management and Accounting	1403	Business and International Management	BUSI
Social Sciences & Humanities	Business, Management and Accounting	1404	Management Information Systems	BUSI
Social Sciences & Humanities	Business, Management and Accounting	1405	Management of Technology and Innovation	BUSI
Social Sciences & Humanities	Business, Management and Accounting	1406	Marketing	BUSI
Social Sciences & Humanities	Business, Management and Accounting	1407	Organizational Behavior and Human Resource Management	BUSI
Social Sciences & Humanities	Business, Management and Accounting	1408	Strategy and Management	BUSI
Social Sciences & Humanities	Business, Management and Accounting	1409	Tourism, Leisure and Hospitality Management	BUSI
Social Sciences & Humanities	Business, Management and Accounting	1410	Industrial Relations	BUSI
Physical Sciences	Chemical Engineering	1500	Chemical Engineering (all)	CENG
Physical Sciences	Chemical Engineering	1501	Chemical Engineering (miscellaneous)	CENG
Physical Sciences	Chemical Engineering	1502	Bioengineering	CENG
Physical Sciences	Chemical Engineering	1503	Catalysis	CENG
Physical Sciences	Chemical Engineering	1504	Chemical Health and Safety	CENG
Physical Sciences	Chemical Engineering	1505	Colloid and Surface Chemistry	CENG
Physical Sciences	Chemical Engineering	1506	Filtration and Separation	CENG
Physical Sciences	Chemical Engineering	1507	Fluid Flow and Transfer Processes	CENG
Physical Sciences	Chemical Engineering	1508	Process Chemistry and Technology	CENG
Physical Sciences	Chemistry	1600	Chemistry (all)	CHEM
Physical Sciences	Chemistry	1601	Chemistry (miscellaneous)	CHEM
Physical Sciences	Chemistry	1602	Analytical Chemistry	CHEM
Physical Sciences	Chemistry	1603	Electrochemistry	CHEM
Physical Sciences	Chemistry	1604	Inorganic Chemistry	CHEM
Physical Sciences	Chemistry	1605	Organic Chemistry	CHEM
Physical Sciences	Chemistry	1606	Physical and Theoretical Chemistry	CHEM
Physical Sciences	Chemistry	1607	Spectroscopy	CHEM
Physical Sciences	Computer Science	1700	Computer Science (all)	COMP
Physical Sciences	Computer Science	1701	Computer Science (miscellaneous)	COMP
Physical Sciences	Computer Science	1702	Artificial Intelligence	COMP
Physical Sciences	Computer Science	1703	Computational Theory and Mathematics	COMP
Physical Sciences	Computer Science	1704	Computer Graphics and Computer-Aided Design	COMP
Physical Sciences	Computer Science	1705	Computer Networks and Communications	COMP
Physical Sciences	Computer Science	1706	Computer Science Applications	COMP
Physical Sciences	Computer Science	1707	Computer Vision and Pattern Recognition	COMP
Physical Sciences	Computer Science	1708	Hardware and Architecture	COMP
Physical Sciences	Computer Science	1709	Human-Computer Interaction	COMP
Physical Sciences	Computer Science	1710	Information Systems	COMP
Physical Sciences	Computer Science	1711	Signal Processing	COMP
Physical Sciences	Computer Science	1712	Software	COMP
Social Sciences & Humanities	Decision Sciences	1800	Decision Sciences (all)	DECI
Social Sciences & Humanities	Decision Sciences	1801	Decision Sciences (miscellaneous)	DECI
Social Sciences & Humanities	Decision Sciences	1802	Information Systems and Management	DECI
Social Sciences & Humanities	Decision Sciences	1803	Management Science and Operations Research	DECI
Social Sciences & Humanities	Decision Sciences	1804	Statistics, Probability and Uncertainty	DECI
Physical Sciences	Earth and Planetary Sciences	1900	Earth and Planetary Sciences (all)	EART
Physical Sciences	Earth and Planetary Sciences	1901	Earth and Planetary Sciences (miscellaneous)	EART
Physical Sciences	Earth and Planetary Sciences	1902	Atmospheric Science	EART
Physical Sciences	Earth and Planetary Sciences	1903	Computers in Earth Sciences	EART
Physical Sciences	Earth and Planetary Sciences	1904	Earth-Surface Processes	EART
Physical Sciences	Earth and Planetary Sciences	1905	Economic Geology	EART
Physical Sciences	Earth and Planetary Sciences	1906	Geochemistry and Petrology	EART
Physical Sciences	Earth and Planetary Sciences	1907	Geology	EART
Physical Sciences	Earth and Planetary Sciences	1908	Geophysics	EART
Physical Sciences	Earth and Planetary Sciences	1909	Geotechnical Engineering and Engineering Geology	EART
Physical Sciences	Earth and Planetary Sciences	1910	Oceanography	EART
Physical Sciences	Earth and Planetary Sciences	1911	Paleontology	EART
Physical Sciences	Earth and Planetary Sciences	1912	Space and Planetary Science	EART
Physical Sciences	Earth and Planetary Sciences	1913	Stratigraphy	EART
Social Sciences & Humanities	Economics, Econometrics and Finance	2000	Economics, Econometrics and Finance (all)	ECON
Social Sciences & Humanities	Economics, Econometrics and Finance	2001	Economics, Econometrics and Finance (miscellaneous)	ECON
Social Sciences & Humanities	Economics, Econometrics and Finance	2002	Economics and Econometrics	ECON
Social Sciences & Humanities	Economics, Econometrics and Finance	2003	Finance	ECON
Physical Sciences	Energy	2100	Energy (all)	ENER
Physical Sciences	Energy	2101	Energy (miscellaneous)	ENER
Physical Sciences	Energy	2102	Energy Engineering and Power Technology	ENER
Physical Sciences	Energy	2103	Fuel Technology	ENER
Physical Sciences	Energy	2104	Nuclear Energy and Engineering	ENER
Physical Sciences	Energy	2105	Renewable Energy, Sustainability and the Environment	ENER
Physical Sciences	Engineering	2200	Engineering (all)	ENGI
Physical Sciences	Engineering	2201	Engineering (miscellaneous)	ENGI
Physical Sciences	Engineering	2202	Aerospace Engineering	ENGI
Physical Sciences	Engineering	2203	Automotive Engineering	ENGI
Physical Sciences	Engineering	2204	Biomedical Engineering	ENGI
Physical Sciences	Engineering	2205	Civil and Structural Engineering	ENGI
Physical Sciences	Engineering	2206	Computational Mechanics	ENGI
Physical Sciences	Engineering	2207	Control and Systems Engineering	ENGI
Physical Sciences	Engineering	2208	Electrical and Electronic Engineering	ENGI
Physical Sciences	Engineering	2209	Industrial and Manufacturing Engineering	ENGI
Physical Sciences	Engineering	2210	Mechanical Engineering	ENGI
Physical Sciences	Engineering	2211	Mechanics of Materials	ENGI
Physical Sciences	Engineering	2212	Ocean Engineering	ENGI
Physical Sciences	Engineering	2213	Safety, Risk, Reliability and Quality	ENGI
Physical Sciences	Engineering	2214	Media Technology	ENGI
Physical Sciences	Engineering	2215	Building and Construction	ENGI
Physical Sciences	Engineering	2216	Architecture	ENGI
Physical Sciences	Environmental Science	2300	Environmental Science (all)	ENVI
Physical Sciences	Environmental Science	2301	Environmental Science (miscellaneous)	ENVI
Physical Sciences	Environmental Science	2302	Ecological Modeling	ENVI
Physical Sciences	Environmental Science	2303	Ecology	ENVI
Physical Sciences	Environmental Science	2304	Environmental Chemistry	ENVI
Physical Sciences	Environmental Science	2305	Environmental Engineering	ENVI
Physical Sciences	Environmental Science	2306	Global and Planetary Change	ENVI
Physical Sciences	Environmental Science	2307	Health, Toxicology and Mutagenesis	ENVI
Physical Sciences	Environmental Science	2308	Management, Monitoring, Policy and Law	ENVI
Physical Sciences	Environmental Science	2309	Nature and Landscape Conservation	ENVI
Physical Sciences	Environmental Science	2310	Pollution	ENVI
Physical Sciences	Environmental Science	2311	Waste Management and Disposal	ENVI
Physical Sciences	Environmental Science	2312	Water Science and Technology	ENVI
Life Sciences	Immunology and Microbiology	2400	Immunology and Microbiology (all)	IMMU
Life Sciences	Immunology and Microbiology	2401	Immunology and Microbiology (miscellaneous)	IMMU
Life Sciences	Immunology and Microbiology	2402	Applied Microbiology and Biotechnology	IMMU
Life Sciences	Immunology and Microbiology	2403	Immunology	IMMU
Life Sciences	Immunology and Microbiology	2404	Microbiology	IMMU
Life Sciences	Immunology and Microbiology	2405	Parasitology	IMMU
Life Sciences	Immunology and Microbiology	2406	Virology	IMMU
Physical Sciences	Materials Science	2500	Materials Science (all)	MATE
Physical Sciences	Materials Science	2501	Materials Science (miscellaneous)	MATE
Physical Sciences	Materials Science	2502	Biomaterials	MATE
Physical Sciences	Materials Science	2503	Ceramics and Composites	MATE
Physical Sciences	Materials Science	2504	Electronic, Optical and Magnetic Materials	MATE
Physical Sciences	Materials Science	2505	Materials Chemistry	MATE
Physical Sciences	Materials Science	2506	Metals and Alloys	MATE
Physical Sciences	Materials Science	2507	Polymers and Plastics	MATE
Physical Sciences	Materials Science	2508	Surfaces, Coatings and Films	MATE
Physical Sciences	Mathematics	2600	Mathematics (all)	MATH
Physical Sciences	Mathematics	2601	Mathematics (miscellaneous)	MATH
Physical Sciences	Mathematics	2602	Algebra and Number Theory	MATH
Physical Sciences	Mathematics	2603	Analysis	MATH
Physical Sciences	Mathematics	2604	Applied Mathematics	MATH
Physical Sciences	Mathematics	2605	Computational Mathematics	MATH
Physical Sciences	Mathematics	2606	Control and Optimization	MATH
Physical Sciences	Mathematics	2607	Discrete Mathematics and Combinatorics	MATH
Physical Sciences	Mathematics	2608	Geometry and Topology	MATH
Physical Sciences	Mathematics	2609	Logic	MATH
Physical Sciences	Mathematics	2610	Mathematical Physics	MATH
Physical Sciences	Mathematics	2611	Modeling and Simulation	MATH
Physical Sciences	Mathematics	2612	Numerical Analysis	MATH
Physical Sciences	Mathematics	2613	Statistics and Probability	MATH
Physical Sciences	Mathematics	2614	Theoretical Computer Science	MATH
Health Sciences	Medicine	2700	Medicine (all)	MEDI
Health Sciences	Medicine	2701	Medicine (miscellaneous)	MEDI
Health Sciences	Medicine	2702	Anatomy	MEDI
Health Sciences	Medicine	2703	Anesthesiology and Pain Medicine	MEDI
Health Sciences	Medicine	2704	Biochemistry (medical)	MEDI
Health Sciences	Medicine	2705	Cardiology and Cardiovascular Medicine	MEDI
Health Sciences	Medicine	2706	Critical Care and Intensive Care Medicine	MEDI
Health Sciences	Medicine	2707	Complementary and Alternative Medicine	MEDI
Health Sciences	Medicine	2708	Dermatology	MEDI
Health Sciences	Medicine	2709	Drug Guides	MEDI
Health Sciences	Medicine	2710	Embryology	MEDI
Health Sciences	Medicine	2711	Emergency Medicine	MEDI
Health Sciences	Medicine	2712	Endocrinology, Diabetes and Metabolism	MEDI
Health Sciences	Medicine	2713	Epidemiology	MEDI
Health Sciences	Medicine	2714	Family Practice	MEDI
Health Sciences	Medicine	2715	Gastroenterology	MEDI
Health Sciences	Medicine	2716	Genetics (clinical)	MEDI
Health Sciences	Medicine	2717	Geriatrics and Gerontology	MEDI
Health Sciences	Medicine	2718	Health Informatics	MEDI
Health Sciences	Medicine	2719	Health Policy	MEDI
Health Sciences	Medicine	2720	Hematology	MEDI
Health Sciences	Medicine	2721	Hepatology	MEDI
Health Sciences	Medicine	2722	Histology	MEDI
Health Sciences	Medicine	2723	Immunology and Allergy	MEDI
Health Sciences	Medicine	2724	Internal Medicine	MEDI
Health Sciences	Medicine	2725	Infectious Diseases	MEDI
Health Sciences	Medicine	2726	Microbiology (medical)	MEDI
Health Sciences	Medicine	2727	Nephrology	MEDI
Health Sciences	Medicine	2728	Neurology (clinical)	MEDI
Health Sciences	Medicine	2729	Obstetrics and Gynecology	MEDI
Health Sciences	Medicine	2730	Oncology	MEDI
Health Sciences	Medicine	2731	Ophthalmology	MEDI
Health Sciences	Medicine	2732	Orthopedics and Sports Medicine	MEDI
Health Sciences	Medicine	2733	Otorhinolaryngology	MEDI
Health Sciences	Medicine	2734	Pathology and Forensic Medicine	MEDI
Health Sciences	Medicine	2735	Pediatrics, Perinatology and Child Health	MEDI
Health Sciences	Medicine	2736	Pharmacology (medical)	MEDI
Health Sciences	Medicine	2737	Physiology (medical)	MEDI
Health Sciences	Medicine	2738	Psychiatry and Mental Health	MEDI
Health Sciences	Medicine	2739	Public Health, Environmental and Occupational Health	MEDI
Health Sciences	Medicine	2740	Pulmonary and Respiratory Medicine	MEDI
Health Sciences	Medicine	2741	Radiology, Nuclear Medicine and Imaging	MEDI
Health Sciences	Medicine	2742	Rehabilitation	MEDI
Health Sciences	Medicine	2743	Reproductive Medicine	MEDI
Health Sciences	Medicine	2744	Reviews and References (medical)	MEDI
Health Sciences	Medicine	2745	Rheumatology	MEDI
Health Sciences	Medicine	2746	Surgery	MEDI
Health Sciences	Medicine	2747	Transplantation	MEDI
Health Sciences	Medicine	2748	Urology	MEDI
Life Sciences	Neuroscience	2800	Neuroscience (all)	NEUR
Life Sciences	Neuroscience	2801	Neuroscience (miscellaneous)	NEUR
Life Sciences	Neuroscience	2802	Behavioral Neuroscience	NEUR
Life Sciences	Neuroscience	2803	Biological Psychiatry	NEUR
Life Sciences	Neuroscience	2804	Cellular and Molecular Neuroscience	NEUR
Life Sciences	Neuroscience	2805	Cognitive Neuroscience	NEUR
Life Sciences	Neuroscience	2806	Developmental Neuroscience	NEUR
Life Sciences	Neuroscience	2807	Endocrine and Autonomic Systems	NEUR
Life Sciences	Neuroscience	2808	Neurology	NEUR
Life Sciences	Neuroscience	2809	Sensory Systems	NEUR
Health Sciences	Nursing	2900	Nursing (all)	NURS
Health Sciences	Nursing	2901	Nursing (miscellaneous)	NURS
Health Sciences	Nursing	2902	Advanced and Specialized Nursing	NURS
Health Sciences	Nursing	2903	Assessment and Diagnosis	NURS
Health Sciences	Nursing	2904	Care Planning	NURS
Health Sciences	Nursing	2905	Community and Home Care	NURS
Health Sciences	Nursing	2906	Critical Care Nursing	NURS
Health Sciences	Nursing	2907	Emergency Nursing	NURS
Health Sciences	Nursing	2908	Fundamentals and Skills	NURS
Health Sciences	Nursing	2909	Gerontology	NURS
Health Sciences	Nursing	2910	Issues, Ethics and Legal Aspects	NURS
Health Sciences	Nursing	2911	Leadership and Management	NURS
Health Sciences	Nursing	2912	LPN and LVN	NURS
Health Sciences	Nursing	2913	Maternity and Midwifery	NURS
Health Sciences	Nursing	2914	Medical and Surgical Nursing	NURS
Health Sciences	Nursing	2915	Nurse Assisting	NURS
Health Sciences	Nursing	2916	Nutrition and Dietetics	NURS
Health Sciences	Nursing	2917	Oncology (nursing)	NURS
Health Sciences	Nursing	2918	Pathophysiology	NURS
Health Sciences	Nursing	2919	Pediatrics	NURS
Health Sciences	Nursing	2920	Pharmacology (nursing)	NURS
Health Sciences	Nursing	2921	Psychiatric Mental Health	NURS
Health Sciences	Nursing	2922	Research and Theory	NURS
Health Sciences	Nursing	2923	Review and Exam Preparation	NURS
Life Sciences	Pharmacology, Toxicology and Pharmaceutics	3000	Pharmacology, Toxicology and Pharmaceutics (all)	PHAR
Life Sciences	Pharmacology, Toxicology and Pharmaceutics	3001	Pharmacology, Toxicology and Pharmaceutics (miscellaneous)	PHAR
Life Sciences	Pharmacology, Toxicology and Pharmaceutics	3002	Drug Discovery	PHAR
Life Sciences	Pharmacology, Toxicology and Pharmaceutics	3003	Pharmaceutical Science	PHAR
Life Sciences	Pharmacology, Toxicology and Pharmaceutics	3004	Pharmacology	PHAR
Life Sciences	Pharmacology, Toxicology and Pharmaceutics	3005	Toxicology	PHAR
Physical Sciences	Physics and Astronomy	3100	Physics and Astronomy (all)	PHYS
Physical Sciences	Physics and Astronomy	3101	Physics and Astronomy (miscellaneous)	PHYS
Physical Sciences	Physics and Astronomy	3102	Acoustics and Ultrasonics	PHYS
Physical Sciences	Physics and Astronomy	3103	Astronomy and Astrophysics	PHYS
Physical Sciences	Physics and Astronomy	3104	Condensed Matter Physics	PHYS
Physical Sciences	Physics and Astronomy	3105	Instrumentation	PHYS
Physical Sciences	Physics and Astronomy	3106	Nuclear and High Energy Physics	PHYS
Physical Sciences	Physics and Astronomy	3107	Atomic and Molecular Physics, and Optics	PHYS
Physical Sciences	Physics and Astronomy	3108	Radiation	PHYS
Physical Sciences	Physics and Astronomy	3109	Statistical and Nonlinear Physics	PHYS
Physical Sciences	Physics and Astronomy	3110	Surfaces and Interfaces	PHYS
Social Sciences & Humanities	Psychology	3200	Psychology (all)	PSYC
Social Sciences & Humanities	Psychology	3201	Psychology (miscellaneous)	PSYC
Social Sciences & Humanities	Psychology	3202	Applied Psychology	PSYC
Social Sciences & Humanities	Psychology	3203	Clinical Psychology	PSYC
Social Sciences & Humanities	Psychology	3204	Developmental and Educational Psychology	PSYC
Social Sciences & Humanities	Psychology	3205	Experimental and Cognitive Psychology	PSYC
Social Sciences & Humanities	Psychology	3206	Neuropsychology and Physiological Psychology	PSYC
Social Sciences & Humanities	Psychology	3207	Social Psychology	PSYC
Social Sciences & Humanities	Social Sciences	3300	Social Sciences (all)	SOCI
Social Sciences & Humanities	Social Sciences	3301	Social Sciences (miscellaneous)	SOCI
Social Sciences & Humanities	Social Sciences	3302	Archeology	SOCI
Social Sciences & Humanities	Social Sciences	3303	Development	SOCI
Social Sciences & Humanities	Social Sciences	3304	Education	SOCI
Social Sciences & Humanities	Social Sciences	3305	Geography, Planning and Development	SOCI
Social Sciences & Humanities	Social Sciences	3306	Health (social science)	SOCI
Social Sciences & Humanities	Social Sciences	3307	Human Factors and Ergonomics	SOCI
Social Sciences & Humanities	Social Sciences	3308	Law	SOCI
Social Sciences & Humanities	Social Sciences	3309	Library and Information Sciences	SOCI
Social Sciences & Humanities	Social Sciences	3310	Linguistics and Language	SOCI
Social Sciences & Humanities	Social Sciences	3311	Safety Research	SOCI
Social Sciences & Humanities	Social Sciences	3312	Sociology and Political Science	SOCI
Social Sciences & Humanities	Social Sciences	3313	Transportation	SOCI
Social Sciences & Humanities	Social Sciences	3314	Anthropology	SOCI
Social Sciences & Humanities	Social Sciences	3315	Communication	SOCI
Social Sciences & Humanities	Social Sciences	3316	Cultural Studies	SOCI
Social Sciences & Humanities	Social Sciences	3317	Demography	SOCI
Social Sciences & Humanities	Social Sciences	3318	Gender Studies	SOCI
Social Sciences & Humanities	Social Sciences	3319	Life-span and Life-course Studies	SOCI
Social Sciences & Humanities	Social Sciences	3320	Political Science and International Relations	SOCI
Social Sciences & Humanities	Social Sciences	3321	Public Administration	SOCI
Social Sciences & Humanities	Social Sciences	3322	Urban Studies	SOCI
Health Sciences	Veterinary	3400	Veterinary (all)	VETE
Health Sciences	Veterinary	3401	Veterinary (miscellaneous)	VETE
Health Sciences	Veterinary	3402	Equine	VETE
Health Sciences	Veterinary	3403	Food Animals	VETE
Health Sciences	Veterinary	3404	Small Animals	VETE
Health Sciences	Dentistry	3500	Dentistry (all)	DENT
Health Sciences	Dentistry	3501	Dentistry (miscellaneous)	DENT
Health Sciences	Dentistry	3502	Dental Assisting	DENT
Health Sciences	Dentistry	3503	Dental Hygiene	DENT
Health Sciences	Dentistry	3504	Oral Surgery	DENT
Health Sciences	Dentistry	3505	Orthodontics	DENT
Health Sciences	Dentistry	3506	Periodontics	DENT
Health Sciences	Health Professions	3600	Health Professions (all)	HEAL
Health Sciences	Health Professions	3601	Health Professions (miscellaneous)	HEAL
Health Sciences	Health Professions	3602	Chiropractics	HEAL
Health Sciences	Health Professions	3603	Complementary and Manual Therapy	HEAL
Health Sciences	Health Professions	3604	Emergency Medical Services	HEAL
Health Sciences	Health Professions	3605	Health Information Management	HEAL
Health Sciences	Health Professions	3606	Medical Assisting and Transcription	HEAL
Health Sciences	Health Professions	3607	Medical Laboratory Technology	HEAL
Health Sciences	Health Professions	3608	Medical Terminology	HEAL
Health Sciences	Health Professions	3609	Occupational Therapy	HEAL
Health Sciences	Health Professions	3610	Optometry	HEAL
Health Sciences	Health Professions	3611	Pharmacy	HEAL
Health Sciences	Health Professions	3612	Physical Therapy, Sports Therapy and Rehabilitation	HEAL
Health Sciences	Health Professions	3613	Podiatry	HEAL
Health Sciences	Health Professions	3614	Radiological and Ultrasound Technology	HEAL
Health Sciences	Health Professions	3615	Respiratory Care	HEAL
Health Sciences	Health Professions	3616	Speech and Hearing	HEAL
