# Supplementary material for: The Premise of Interdisciplinarity and Its Actual Absence—A Bibliometric Analysis of Publications on Heavy Rainfall
Source: MDPI journal article supplement (doi:10.3390/w14193001), 2022-09-23
Supplement: s1 [file s1 › TS2_frequency_distribution.csv]

	Subject Area	Frequency
1	Agricultural and Biological Sciences	72211
2	Arts and Humanities	3651
3	Biochemistry, Genetics and Molecular Biology	62691
4	Business, Management and Accounting	2917
5	Chemical Engineering	10628
6	Chemistry	24060
7	Computer Science	10771
8	Decision Sciences	1946
9	Dentistry	91
10	Earth and Planetary Sciences	93293
11	Economics, Econometrics and Finance	2669
12	Energy	6889
13	Engineering	25794
14	Environmental Science	107911
15	Health Professions	468
16	Immunology and Microbiology	15064
17	Materials Science	12774
18	Mathematics	8503
19	Medicine	30597
20	Multidisciplinary	8412
21	Neuroscience	4611
22	Nursing	801
23	Pharmacology, Toxicology and Pharmaceutics	6149
24	Physics and Astronomy	12924
25	Psychology	3002
26	Social Sciences	15022
27	Veterinary	889
