# Supplementary material for: The Premise of Interdisciplinarity and Its Actual Absence—A Bibliometric Analysis of Publications on Heavy Rainfall
Source: MDPI journal article supplement (doi:10.3390/w14193001), 2022-09-23
Supplement: s1 [file s1 › TS3_Jac_area.csv]

	Agricultural.and.Biological.Sciences	Arts.and.Humanities	Biochemistry..Genetics.and.Molecular.Biology	Business..Management.and.Accounting	Chemical.Engineering	Chemistry	Computer.Science	Decision.Sciences	Dentistry	Earth.and.Planetary.Sciences	Economics..Econometrics.and.Finance	Energy	Engineering	Environmental.Science	Health.Professions	Immunology.and.Microbiology	Materials.Science	Mathematics	Medicine	Multidisciplinary	Neuroscience	Nursing	Pharmacology..Toxicology.and.Pharmaceutics	Physics.and.Astronomy	Psychology	Social.Sciences	Veterinary
Agricultural and Biological Sciences	0	0,0103648672937511	0,0409883720930233	0,00425022448368752	0,00564940149904911	0,0141192525719085	0,0174140397612353	0,0059206631142688	0	0,0719297828310459	0,00354458228931125	0,0128424657534247	0,0401366626221342	0,0923735032485547	0,000190827555499014	0,01	0,00452595074354905	0,0105482972799315	0,0142989685095235	0,0252018215690333	0,00163893091275845	0,000318106629342156	0,00476626947754354	0,00899541848251201	0,000506425270621004	0,0443438914027149	0,00221490950512593
Arts and Humanities	0,0103648672937511	0	0,00500214377590396	0,00259067357512953	0,000567697984672154	0,0026782035434693	0,002925877763329	0,00118436636399526	0	0,00973083520253331	0,00152749490835031	0,00141617985484156	0,00199059994470556	0,00641732028262138	0	0,00216731686172518	0,000759301442672741	0,00158658204895739	0,0024265954865324	0,013431706394249	0,00349406009783368	0	0	0,00445806631373642	0	0,0105311355311355	0
Biochemistry, Genetics and Molecular Biology	0,0409883720930233	0,00500214377590396	0	0,00404858299595142	0,00804256372185103	0,0145407890516412	0,0148580026330638	0,00689267126178084	0	0,0216609638693963	0,00396160292549139	0,0149091627172196	0,021101782427154	0,0319251854240568	0,000679347826086957	0,0125584112149533	0,00651781999722646	0,010054742486873	0,0192128551467163	0,0197220519108931	0,00281410362522761	0,000679463224052998	0,00516953018093356	0,00932400932400932	0,00050251256281407	0,0318853974121996	0,00166805671392827
Business, Management and Accounting	0,00425022448368752	0,00259067357512953	0,00404858299595142	0	0,00614754098360656	0,00378071833648393	0,0071203841695645	0,0045137464095199	0	0,0054351406548521	0,00967221923696937	0,0136512559155442	0,00636196216306714	0,00730180053300977	0,00169491525423729	0,0018018018018018	0,00512820512820513	0,00301065308012969	0,00647249190938511	0,00114003420102603	0	0	0,00105318588730911	0,00199430199430199	0,000792393026941363	0,00835569183595247	0
Chemical Engineering	0,00564940149904911	0,000567697984672154	0,00804256372185103	0,00614754098360656	0	0,0324473593372454	0,00496620223479101	0,0013713658804169	0	0,0112839474690807	0,00227642276422764	0,0494343716101038	0,0122612219123296	0,0120101003670932	0	0,00410196308233226	0,0176342919153554	0,00362713093942691	0,00344299923488906	0,00278896808180973	0,000392156862745098	0,000419639110365086	0,00226025185663545	0,0161463939720129	0	0,00588523786169691	0
Chemistry	0,0141192525719085	0,0026782035434693	0,0145407890516412	0,00378071833648393	0,0324473593372454	0	0,0046582042622569	0,00200682319887618	0	0,0140136763668701	0,00158478605388273	0,034289356277884	0,01349487785658	0,0254721124286342	0,000536912751677852	0,0071805702217529	0,0161612130885874	0,00364910232082908	0,0122925629993854	0,00890897353131052	0,00077120822622108	0,000537056928034372	0,0153002968714318	0,0162615255658005	0	0,0083499261352688	0,00026048450117218
Computer Science	0,0174140397612353	0,002925877763329	0,0148580026330638	0,0071203841695645	0,00496620223479101	0,0046582042622569	0	0,0104317124057134	0	0,0265515799534078	0,0020997375328084	0,00943295101297031	0,0286291839037232	0,0325108198469838	0,000795861520095503	0,00148441365660564	0,00803782505910165	0,0239108662994492	0,00714741544352266	0,00584730803177405	0,00231481481481481	0,000198886237072395	0,000870473537604457	0,011536876802637	0,0017640141121129	0,0217548076923077	0
Decision Sciences	0,0059206631142688	0,00118436636399526	0,00689267126178084	0,0045137464095199	0,0013713658804169	0,00200682319887618	0,0104317124057134	0	0	0,00737414787624541	0,00383693045563549	0,00312228967909801	0,00856732257351316	0,0106684555625284	0	0,000410340582683627	0,00326916091536506	0,00932711525649567	0,00141143260409315	0,00274323335771763	0	0	0,000473036896877956	0,0018796992481203	0,00203527815468114	0,00662650602409639	0
Dentistry	0	0	0	0	0	0	0	0	0	6,80087051142546e-05	0	0	0	4,40771349862259e-05	0	0	0	0	0	0	0	0	0	0	0	0	0
Earth and Planetary Sciences	0,0719297828310459	0,00973083520253331	0,0216609638693963	0,0054351406548521	0,0112839474690807	0,0140136763668701	0,0265515799534078	0,00737414787624541	6,80087051142546e-05	0	0,0030255677095455	0,0245718089935242	0,0725167862931234	0,150269189355484	0,000237578061363019	0,00285939656872412	0,00665948486925864	0,0188655672163918	0,0121779419591147	0,0304612172204139	0,00108089849687553	0,000305488612063406	0,00212441080793999	0,0178571428571429	0,000745005079580088	0,0583533377598447	0,00016903884512661
Economics, Econometrics and Finance	0,00354458228931125	0,00152749490835031	0,00396160292549139	0,00967221923696937	0,00227642276422764	0,00158478605388273	0,0020997375328084	0,00383693045563549	0	0,0030255677095455	0	0,00423728813559322	0,0044888914142849	0,00625981504100506	0	0,00160771704180064	0,00228519195612431	0,00277427490542245	0,004630890765459	0,00163065633917652	0	0,00121212121212121	0,00129533678756477	0,000632911392405063	0,00110253583241455	0,00621069182389937	0
Energy	0,0128424657534247	0,00141617985484156	0,0149091627172196	0,0136512559155442	0,0494343716101038	0,034289356277884	0,00943295101297031	0,00312228967909801	0	0,0245718089935242	0,00423728813559322	0	0,0226859385469513	0,0190203497290111	0	0,00180212650928095	0,0164132688320663	0,00762355415352261	0,0116550116550117	0,0104521432765708	0,000854883522120111	0	0,0011472275334608	0,016768066478706	0,000217533173809006	0,0150824919970451	0,000216029379995679
Engineering	0,0401366626221342	0,00199059994470556	0,021101782427154	0,00636196216306714	0,0122612219123296	0,01349487785658	0,0286291839037232	0,00856732257351316	0	0,0725167862931234	0,0044888914142849	0,0226859385469513	0	0,109766961231471	0,000294533459000942	0,00200144548840829	0,00924143242202541	0,0204288538551224	0,00823170731707317	0,00987441280797622	0,00099241097489784	0,000117799505242078	0,002151511720077	0,0106210432689792	0,000703812316715543	0,0448197466709971	0,000175530981218185
Environmental Science	0,0923735032485547	0,00641732028262138	0,0319251854240568	0,00730180053300977	0,0120101003670932	0,0254721124286342	0,0325108198469838	0,0106684555625284	4,40771349862259e-05	0,150269189355484	0,00625981504100506	0,0190203497290111	0,109766961231471	0	0,000462381927472092	0,00749989162006329	0,00848954966602025	0,0234444116779711	0,018021246100666	0,0266163636740532	0,00153731277726534	0,000462392108508015	0,0077507532422165	0,0126976724466867	0,0013418980157508	0,0707624589674724	0,000724987916868052
Health Professions	0,000190827555499014	0	0,000679347826086957	0,00169491525423729	0	0,000536912751677852	0,000795861520095503	0	0	0,000237578061363019	0	0	0,000294533459000942	0,000462381927472092	0	0	0	0	0,00301810865191147	0,00023719165085389	0	0	0,00117924528301887	0	0	0,000496031746031746	0
Immunology and Microbiology	0,01	0,00216731686172518	0,0125584112149533	0,0018018018018018	0,00410196308233226	0,0071805702217529	0,00148441365660564	0,000410340582683627	0	0,00285939656872412	0,00160771704180064	0,00180212650928095	0,00200144548840829	0,00749989162006329	0	0	0,0023696682464455	0,00115848007414272	0,0311940680132958	0,00708540788969743	0,00074794315632012	0,00342759211653813	0,00478214665249734	0,00114187838995147	0,00159872102318145	0,00213479719426654	0,0214626391096979
Materials Science	0,00452595074354905	0,000759301442672741	0,00651781999722646	0,00512820512820513	0,0176342919153554	0,0161612130885874	0,00803782505910165	0,00326916091536506	0	0,00665948486925864	0,00228519195612431	0,0164132688320663	0,00924143242202541	0,00848954966602025	0	0,0023696682464455	0	0,00693691740732712	0,00322357817177067	0,00359518245550962	0	0	0,00362483008608971	0,0121532364597094	0,00126984126984127	0,00454986201238159	0
Mathematics	0,0105482972799315	0,00158658204895739	0,010054742486873	0,00301065308012969	0,00362713093942691	0,00364910232082908	0,0239108662994492	0,00932711525649567	0	0,0188655672163918	0,00277427490542245	0,00762355415352261	0,0204288538551224	0,0234444116779711	0	0,00115848007414272	0,00693691740732712	0	0,00441681662031736	0,00504843771319416	0,000871586287042417	0	0,000750938673341677	0,0106210621062106	0,000297707651086633	0,0125481343779047	0
Medicine	0,0142989685095235	0,0024265954865324	0,0192128551467163	0,00647249190938511	0,00344299923488906	0,0122925629993854	0,00714741544352266	0,00141143260409315	0	0,0121779419591147	0,004630890765459	0,0116550116550117	0,00823170731707317	0,018021246100666	0,00301810865191147	0,0311940680132958	0,00322357817177067	0,00441681662031736	0	0,0146215596330275	0,00158629441624365	0,00335570469798658	0,00897470764209954	0,00604457876841708	0,00195694716242661	0,0147846727704307	0,0130548302872063
Multidisciplinary	0,0252018215690333	0,013431706394249	0,0197220519108931	0,00114003420102603	0,00278896808180973	0,00890897353131052	0,00584730803177405	0,00274323335771763	0	0,0304612172204139	0,00163065633917652	0,0104521432765708	0,00987441280797622	0,0266163636740532	0,00023719165085389	0,00708540788969743	0,00359518245550962	0,00504843771319416	0,0146215596330275	0	0,00205761316872428	0,000474608448030375	0,00264066626041032	0,00815510078473611	0	0,0177920281654721	0,00161924589405505
Neuroscience	0,00163893091275845	0,00349406009783368	0,00281410362522761	0	0,000392156862745098	0,00077120822622108	0,00231481481481481	0	0	0,00108089849687553	0	0,000854883522120111	0,00099241097489784	0,00153731277726534	0	0,00074794315632012	0	0,000871586287042417	0,00158629441624365	0,00205761316872428	0	0	0	0,00114155251141553	0	0,00163291966035271	0
Nursing	0,000318106629342156	0	0,000679463224052998	0	0,000419639110365086	0,000537056928034372	0,000198886237072395	0	0	0,000305488612063406	0,00121212121212121	0	0,000117799505242078	0,000462392108508015	0	0,00342759211653813	0	0	0,00335570469798658	0,000474608448030375	0	0	0,00118063754427391	0	0	8,26446280991736e-05	0
Pharmacology, Toxicology and Pharmaceutics	0,00476626947754354	0	0,00516953018093356	0,00105318588730911	0,00226025185663545	0,0153002968714318	0,000870473537604457	0,000473036896877956	0	0,00212441080793999	0,00129533678756477	0,0011472275334608	0,002151511720077	0,0077507532422165	0,00117924528301887	0,00478214665249734	0,00362483008608971	0,000750938673341677	0,00897470764209954	0,00264066626041032	0	0,00118063754427391	0	0,00220333648095688	0	0,00250215028540152	0,00208333333333333
Physics and Astronomy	0,00899541848251201	0,00445806631373642	0,00932400932400932	0,00199430199430199	0,0161463939720129	0,0162615255658005	0,011536876802637	0,0018796992481203	0	0,0178571428571429	0,000632911392405063	0,016768066478706	0,0106210432689792	0,0126976724466867	0	0,00114187838995147	0,0121532364597094	0,0106210621062106	0,00604457876841708	0,00815510078473611	0,00114155251141553	0	0,00220333648095688	0	0	0,00958041958041958	0
Psychology	0,000506425270621004	0	0,00050251256281407	0,000792393026941363	0	0	0,0017640141121129	0,00203527815468114	0	0,000745005079580088	0,00110253583241455	0,000217533173809006	0,000703812316715543	0,0013418980157508	0	0,00159872102318145	0,00126984126984127	0,000297707651086633	0,00195694716242661	0	0	0	0	0	0	0,00106820049301561	0
Social Sciences	0,0443438914027149	0,0105311355311355	0,0318853974121996	0,00835569183595247	0,00588523786169691	0,0083499261352688	0,0217548076923077	0,00662650602409639	0	0,0583533377598447	0,00621069182389937	0,0150824919970451	0,0448197466709971	0,0707624589674724	0,000496031746031746	0,00213479719426654	0,00454986201238159	0,0125481343779047	0,0147846727704307	0,0177920281654721	0,00163291966035271	8,26446280991736e-05	0,00250215028540152	0,00958041958041958	0,00106820049301561	0	0,00040950040950041
Veterinary	0,00221490950512593	0	0,00166805671392827	0	0	0,00026048450117218	0	0	0	0,00016903884512661	0	0,000216029379995679	0,000175530981218185	0,000724987916868052	0	0,0214626391096979	0	0	0,0130548302872063	0,00161924589405505	0	0	0,00208333333333333	0	0	0,00040950040950041	0
