# Supplementary material for: The Premise of Interdisciplinarity and Its Actual Absence—A Bibliometric Analysis of Publications on Heavy Rainfall
Source: MDPI journal article supplement (doi:10.3390/w14193001), 2022-09-23
Supplement: s1 [file s1 › TS4_Jac_classifications.csv]

	Multidisciplinary	Agricultural and Biological Sciences (all)	Agricultural and Biological Sciences (miscellaneous)	Agronomy and Crop Science	Animal Science and Zoology	Aquatic Science	Ecology, Evolution, Behavior and Systematics	Food Science	Forestry	Horticulture	Insect Science	Plant Science	Soil Science	Arts and Humanities (all)	Arts and Humanities (miscellaneous)	History	Language and Linguistics	Archeology (arts and humanities)	Classics	Conservation	History and Philosophy of Science	Literature and Literary Theory	Museology	Music	Philosophy	Religious Studies	Visual Arts and Performing Arts	Biochemistry, Genetics and Molecular Biology (all)	Aging	Biochemistry	Biophysics	Biotechnology	Cancer Research	Cell Biology	Clinical Biochemistry	Developmental Biology	Endocrinology	Genetics	Molecular Biology	Molecular Medicine	Physiology	Structural Biology	Business, Management and Accounting (all)	Business, Management and Accounting (miscellaneous)	Accounting	Business and International Management	Management Information Systems	Management of Technology and Innovation	Marketing
Multidisciplinary	0,98566573075218	0,992147098257039	0,998717799277305	0,995656108597285	0,996536685479733	0,991354204586822	0,987362558903327	0,998463175316231	0,994330571303969	0,999717633771001	0,999160016799664	0,996389891696751	0,992906216835167	0,999124087591241	0,998656636217088	0,999562937062937	1	0,993386405388855	1	1	0,999277352218529	0,999852267690944	0,999852485617348	1	1	1	1	0,990217969165338	1	0,994026776519052	0,999707217098521	0,998557566220823	1	0,9992792273317	0,999705882352941	0,999852594339623	0,999852637783672	0,99874739039666	0,999286631473819	0,999852811304092	0,999171728326891	1	1	1	1	0,999856052972506	1	0,999714367323622	1
Agricultural and Biological Sciences (all)	0,992147098257039	0,986159169550173	0,998024780032322	0,994280029843323	0,99140821458508	0,994066061019797	0,987310794888063	0,997430249632893	0,996477567667779	0,999754540991654	0,99733527131783	0,992816091954023	0,995384924085346	0,999219359875098	0,998422357448727	0,999481193255512	1	0,998269230769231	1	1	1	0,999733971801011	0,999734677633324	1	1	1	1	0,990035808812082	1	0,996379310344828	0,999476576812353	0,997399783315276	1	0,998726763432646	0,999472295514512	0,999204665959703	0,999735169491525	0,996883241428914	0,997747183979975	0,999735729386892	0,9983463264824	0,999734466277217	0,9997425997426	1	1	1	1	0,999749561733033	1
Agricultural and Biological Sciences (miscellaneous)	0,998717799277305	0,998024780032322	0,986286341195831	0,995101241018942	0,998956884561891	0,997730314846069	0,998047934063551	0,995730145175064	0,997971602434077	1	1	0,998637230853094	0,99685703334611	1	0,999202551834131	1	1	0,999694563225412	1	1	1	1	1	1	1	1	0,999455040871935	0,998239823982398	1	0,997107438016529	1	0,99962852897474	1	1	1	1	1	0,999110320284697	0,999516674722088	1	0,998262380538662	1	1	1	1	0,999500748876685	1	0,999514327343371	1
Agronomy and Crop Science	0,995656108597285	0,994280029843323	0,995101241018942	0,976679750634957	0,994212098581031	0,994803342164255	0,99391915039397	0,993496748374187	0,993377483443709	0,9963298791019	0,997873697639804	0,988381606938308	0,987468346211285	1	0,999800677695834	1	1	0,999654039093582	1	1	1	1	1	1	1	1	1	0,9961615012795	1	0,994236785773094	0,999772520473157	0,997107597377555	0,999769532150265	0,998666666666667	1	1	1	0,994930291508238	0,998906625847365	0,99931129476584	0,993729096989967	0,999769585253456	0,999775734469612	1	1	0,999778319663046	1	0,99934282584885	1
Animal Science and Zoology	0,996536685479733	0,99140821458508	0,998956884561891	0,994212098581031	0,971590909090909	0,998112518265952	0,98890082348729	0,999275099673795	0,998397435897436	1	0,992997198879552	0,994465582843307	0,9977219103409	1	0,998851234922458	1	1	0,999601116872756	1	1	1	1	1	1	0,999071494893222	1	1	0,992817238627295	1	0,99921647638236	1	0,998960498960499	1	0,999186991869919	1	1	0,998137802607076	0,993894165535957	0,997692307692308	1	0,996086105675147	0,99906103286385	1	1	1	1	1	1	1
Aquatic Science	0,991354204586822	0,994066061019797	0,997730314846069	0,994803342164255	0,998112518265952	0,973699590882525	0,986765554914065	0,997420867526377	0,989521025410389	0,999745433717304	0,999429368501141	0,997384481255449	0,987813674499829	1	0,998755135067845	0,999806401652039	1	0,997560975609756	1	1	0,999678477268343	1	1	1	1	1	1	0,995734544648792	1	0,983897010691687	0,999870658992434	0,999446494464945	0,999935094437593	0,999871564346263	0,999935203784099	1	1	0,999747187460498	0,999680327344799	0,999935174380915	0,999306911977821	1	0,999935596058479	0,999935220573946	0,999935258319306	0,999871613814354	0,999935471381558	0,999936040933802	1
Ecology, Evolution, Behavior and Systematics	0,987362558903327	0,987310794888063	0,998047934063551	0,99391915039397	0,98890082348729	0,986765554914065	0,966693635382956	0,998572683355292	0,990803316379851	0,999353085780825	0,995362020097913	0,986548556430446	0,993262908267759	0,999866737739872	0,994789728321548	0,999600692133635	1	0,989862171090101	1	1	0,99933932346723	1	1	1	0,99986553717897	1	1	0,990749030140257	1	0,996129116913791	0,999866328031012	0,998670694864048	1	0,999472782390932	0,999865771812081	1	0,999865501008742	0,996160245744272	0,998431577571559	1	0,995677050222505	0,999730603448276	1	1	1	1	1	1	1
Food Science	0,998463175316231	0,997430249632893	0,995730145175064	0,993496748374187	0,999275099673795	0,997420867526377	0,998572683355292	0,988856304985337	0,997371728945263	0,998514851485149	1	0,998027613412229	0,996440179538771	0,999442275515895	1	1	1	1	1	1	1	1	1	1	1	1	1	0,99774011299435	1	0,996547033587946	0,999435028248588	0,993354182955434	1	0,998935037273695	1	1	1	0,99906103286385	0,999487442337263	1	0,999085086916743	1	1	1	1	0,998938428874735	1	0,998969072164948	1
Forestry	0,994330571303969	0,996477567667779	0,997971602434077	0,993377483443709	0,998397435897436	0,989521025410389	0,990803316379851	0,997371728945263	0,983448861225067	0,998644435407347	1	0,992318120198825	0,98941565600882	0,999860276652229	0,999096657633243	0,999720943211944	1	0,998589728522741	1	1	0,999723145071982	1	1	1	0,999858956276446	1	1	0,996620929756297	1	0,993742009286051	0,999859826184469	0,999495904221802	1	0,99972383319525	1	1	1	0,998931623931624	1	1	0,997211525693799	1	1	1	1	1	1	0,999726177437021	1
Horticulture	0,999717633771001	0,999754540991654	1	0,9963298791019	1	0,999745433717304	0,999353085780825	0,998514851485149	0,998644435407347	0,981132075471698	0,998569384835479	0,993503480278422	0,998529920442753	1	1	1	1	0,999434708875071	1	1	1	1	1	1	1	1	1	0,999671808336068	1	0,999512135626296	1	1	1	1	1	1	1	0,993243243243243	0,99822695035461	1	0,994981179422836	1	1	1	1	1	1	1	1
Insect Science	0,999160016799664	0,99733527131783	1	0,997873697639804	0,992997198879552	0,999429368501141	0,995362020097913	1	1	0,998569384835479	0,955497382198953	0,99685534591195	0,999742312317471	1	1	1	1	1	1	1	1	1	1	1	1	1	1	0,996452757175105	1	0,999394819656258	1	1	1	0,998201438848921	1	1	1	0,996277915632754	0,998407643312102	1	0,990665110851809	1	1	1	1	1	1	1	1
Plant Science	0,996389891696751	0,992816091954023	0,998637230853094	0,988381606938308	0,994465582843307	0,997384481255449	0,986548556430446	0,998027613412229	0,992318120198825	0,993503480278422	0,99685534591195	0,974068071312804	0,994633547991414	0,999484270242393	0,999605833661805	0,999487179487179	1	0,996048632218845	1	1	0,999501743896363	1	1	1	1	1	1	0,994953927161036	1	0,998147767030253	0,998955613577023	0,996681415929204	1	0,99553792761527	1	1	1	0,98890368397692	0,997131931166348	0,998934469898775	0,985658409387223	0,999462365591398	1	1	1	1	1	1	1
Soil Science	0,992906216835167	0,995384924085346	0,99685703334611	0,987468346211285	0,9977219103409	0,987813674499829	0,993262908267759	0,996440179538771	0,98941565600882	0,998529920442753	0,999742312317471	0,994633547991414	0,978158572316434	1	0,999497655726725	0,999823959158525	1	0,998582342285579	1	1	0,999824837975127	1	1	1	1	1	1	0,996629858023806	1	0,9917329261229	0,999911723163842	0,998679541140546	0,999911276727886	0,99982511367611	0,999911480924139	1	1	0,998715203426124	0,999391463096584	0,999822836389406	0,99837980728234	0,999911284599006	0,999912211394961	1	1	1	1	0,999739062364095	1
Arts and Humanities (all)	0,999124087591241	0,999219359875098	1	1	1	1	0,999866737739872	0,999442275515895	0,999860276652229	1	1	0,999484270242393	1	1	0,997416020671835	1	1	0,999350649350649	1	1	1	1	1	1	1	1	1	0,998934659090909	1	1	1	1	1	1	1	1	1	1	1	1	1	1	1	1	1	1	1	0,996923076923077	1
Arts and Humanities (miscellaneous)	0,998656636217088	0,998422357448727	0,999202551834131	0,999800677695834	0,998851234922458	0,998755135067845	0,994789728321548	1	0,999096657633243	1	1	0,999605833661805	0,999497655726725	0,997416020671835	0,991266375545852	0,998727735368957	1	0,983365019011407	1	1	1	1	1	1	1	1	1	0,998828010547905	1	0,999299556385711	1	1	1	1	1	1	1	1	1	1	1	1	1	1	1	1	1	1	1
History	0,999562937062937	0,999481193255512	1	1	1	0,999806401652039	0,999600692133635	1	0,999720943211944	1	1	0,999487179487179	0,999823959158525	1	0,998727735368957	1	1	0,997416020671835	1	1	1	1	1	1	1	0,99009900990099	1	0,998938804386275	1	0,999874749498998	1	1	1	1	1	1	1	1	1	1	1	1	1	1	1	1	1	1	1
Language and Linguistics	1	1	1	1	1	1	1	1	1	1	1	1	1	1	1	1	1	1	1	1	1	1	1	1	1	1	1	1	1	1	1	1	1	1	1	1	1	1	1	1	1	1	1	1	1	1	1	1	1
Archeology (arts and humanities)	0,993386405388855	0,998269230769231	0,999694563225412	0,999654039093582	0,999601116872756	0,997560975609756	0,989862171090101	1	0,998589728522741	0,999434708875071	1	0,996048632218845	0,998582342285579	0,999350649350649	0,983365019011407	0,997416020671835	1	0,972451790633609	1	1	0,999378109452736	1	0,998632946001367	1	1	1	1	0,99784327821711	1	0,999356982102669	1	1	1	1	1	1	1	0,999467518636848	1	1	0,998447204968944	1	1	1	1	1	1	0,999407582938389	1
Classics	1	1	1	1	1	1	1	1	1	1	1	1	1	1	1	1	1	1	1	1	1	1	1	1	1	1	1	1	1	1	1	1	1	1	1	1	1	1	1	1	1	1	1	1	1	1	1	1	1
Conservation	1	1	1	1	1	1	1	1	1	1	1	1	1	1	1	1	1	1	1	0,888888888888889	1	1	1	1	1	1	1	1	1	1	1	1	1	1	1	1	1	1	1	1	1	1	1	1	1	1	1	1	1
History and Philosophy of Science	0,999277352218529	1	1	1	1	0,999678477268343	0,99933932346723	1	0,999723145071982	1	1	0,999501743896363	0,999824837975127	1	1	1	1	0,999378109452736	1	1	0,987261146496815	1	1	1	1	1	1	0,998612556364898	1	0,999751243781094	1	1	1	0,996978851963746	1	1	1	1	1	1	1	1	0,996491228070175	1	1	1	1	1	1
Literature and Literary Theory	0,999852267690944	0,999733971801011	1	1	1	1	1	1	1	1	1	1	1	1	1	1	1	1	1	1	1	1	1	1	1	1	1	0,999633967789165	1	1	1	1	1	1	1	1	1	1	1	1	1	1	1	1	1	1	1	1	1
Museology	0,999852485617348	0,999734677633324	1	1	1	1	1	1	1	1	1	1	1	1	1	1	1	0,998632946001367	1	1	1	1	1	1	1	1	1	0,99963530269876	1	1	1	1	1	1	1	1	1	1	1	1	1	1	1	1	1	1	1	1	1
Music	1	1	1	1	1	1	1	1	1	1	1	1	1	1	1	1	1	1	1	1	1	1	1	1	1	1	1	1	1	1	1	1	1	1	1	1	1	1	1	1	1	1	1	1	1	1	1	1	1
Philosophy	1	1	1	1	0,999071494893222	1	0,99986553717897	1	0,999858956276446	1	1	1	1	1	1	1	1	1	1	1	1	1	1	1	1	1	1	1	1	1	1	1	1	1	1	1	1	0,997767857142857	1	1	1	1	1	1	1	1	1	1	1
Religious Studies	1	1	1	1	1	1	1	1	1	1	1	1	1	1	1	0,99009900990099	1	1	1	1	1	1	1	1	1	0,5	1	1	1	1	1	1	1	1	1	1	1	1	1	1	1	1	1	1	1	1	1	1	1
Visual Arts and Performing Arts	1	1	0,999455040871935	1	1	1	1	1	1	1	1	1	1	1	1	1	1	1	1	1	1	1	1	1	1	1	1	1	1	1	1	1	1	1	1	1	1	1	1	1	1	1	1	1	1	1	1	1	1
Biochemistry, Genetics and Molecular Biology (all)	0,990217969165338	0,990035808812082	0,998239823982398	0,9961615012795	0,992817238627295	0,995734544648792	0,990749030140257	0,99774011299435	0,996620929756297	0,999671808336068	0,996452757175105	0,994953927161036	0,996629858023806	0,998934659090909	0,998828010547905	0,998938804386275	1	0,99784327821711	1	1	0,998612556364898	0,999633967789165	0,99963530269876	1	1	1	1	0,987545787545788	1	0,996881496881497	0,998925886143931	0,996935079409306	1	0,997930320800276	0,999276149113283	0,999271667880554	0,999636231356857	0,997141041931385	0,997980477953551	0,999637286906057	0,998441396508728	1	1	1	1	1	0,99964639321075	0,999662845583277	1
Aging	1	1	1	1	1	1	1	1	1	1	1	1	1	1	1	1	1	1	1	1	1	1	1	1	1	1	1	1	1	1	1	1	1	1	1	1	1	1	1	1	1	1	1	1	1	1	1	1	1
Biochemistry	0,994026776519052	0,996379310344828	0,997107438016529	0,994236785773094	0,99921647638236	0,983897010691687	0,996129116913791	0,996547033587946	0,993742009286051	0,999512135626296	0,999394819656258	0,998147767030253	0,9917329261229	1	0,999299556385711	0,999874749498998	1	0,999356982102669	1	1	0,999751243781094	1	1	1	1	1	1	0,996881496881497	1	0,979835129993659	0,999748396024657	0,999542909381785	1	0,999875915125946	0,999873721429473	1	1	0,999398097989647	0,999507874015748	0,999873609706775	0,999402128422815	1	0,999750374438342	1	0,999873928391326	0,999876007439554	0,999874733809345	0,999876862455363	1
Biophysics	0,999707217098521	0,999476576812353	1	0,999772520473157	1	0,999870658992434	0,999866328031012	0,999435028248588	0,999859826184469	1	1	0,998955613577023	0,999911723163842	1	1	1	1	1	1	1	1	1	1	1	1	1	1	0,998925886143931	1	0,999748396024657	0,984848484848485	1	1	0,995833333333333	0,99	1	1	0,997967479674797	0,996794871794872	1	0,998175182481752	1	1	1	1	1	1	1	1
Biotechnology	0,998557566220823	0,997399783315276	0,99962852897474	0,997107597377555	0,998960498960499	0,999446494464945	0,998670694864048	0,993354182955434	0,999495904221802	1	1	0,996681415929204	0,998679541140546	1	1	1	1	1	1	1	1	1	1	1	1	1	1	0,996935079409306	1	0,999542909381785	1	0,988505747126437	1	0,99904214559387	1	1	0,998875140607424	0,996130030959752	0,995503597122302	1	0,998519615099926	1	1	1	1	1	1	1	1
Cancer Research	1	1	1	0,999769532150265	1	0,999935094437593	1	1	1	1	1	1	0,999911276727886	1	1	1	1	1	1	1	1	1	1	1	1	1	1	1	1	1	1	1	1	1	1	1	1	1	1	1	1	1	1	1	1	1	1	1	1
Cell Biology	0,9992792273317	0,998726763432646	1	0,998666666666667	0,999186991869919	0,999871564346263	0,999472782390932	0,998935037273695	0,99972383319525	1	0,998201438848921	0,99553792761527	0,99982511367611	1	1	1	1	1	1	1	0,996978851963746	1	1	1	1	1	1	0,997930320800276	1	0,999875915125946	0,995833333333333	0,99904214559387	1	1	1	1	1	0,996666666666667	0,997624703087886	1	0,995419847328244	1	0,996699669966997	1	1	1	1	1	1
Clinical Biochemistry	0,999705882352941	0,999472295514512	1	1	1	0,999935203784099	0,999865771812081	1	1	1	1	1	0,999911480924139	1	1	1	1	1	1	1	1	1	1	1	1	1	1	0,999276149113283	1	0,999873721429473	0,99	1	1	1	1	1	1	1	1	1	1	1	0,993865030674847	1	1	1	1	1	1
Developmental Biology	0,999852594339623	0,999204665959703	1	1	1	1	1	1	1	1	1	1	1	1	1	1	1	1	1	1	1	1	1	1	1	1	1	0,999271667880554	1	1	1	1	1	1	1	1	1	1	1	1	1	1	1	1	1	1	1	1	1
Endocrinology	0,999852637783672	0,999735169491525	1	1	0,998137802607076	1	0,999865501008742	1	1	1	1	1	1	1	1	1	1	1	1	1	1	1	1	1	1	1	1	0,999636231356857	1	1	1	0,998875140607424	1	1	1	1	1	1	1	1	1	1	1	1	1	1	1	1	1
Genetics	0,99874739039666	0,996883241428914	0,999110320284697	0,994930291508238	0,993894165535957	0,999747187460498	0,996160245744272	0,99906103286385	0,998931623931624	0,993243243243243	0,996277915632754	0,98890368397692	0,998715203426124	1	1	1	1	0,999467518636848	1	1	1	1	1	1	0,997767857142857	1	1	0,997141041931385	1	0,999398097989647	0,997967479674797	0,996130030959752	1	0,996666666666667	1	1	1	0,983606557377049	0,99702380952381	1	0,995584988962472	1	1	1	1	1	1	1	1
Molecular Biology	0,999286631473819	0,997747183979975	0,999516674722088	0,998906625847365	0,997692307692308	0,999680327344799	0,998431577571559	0,999487442337263	1	0,99822695035461	0,998407643312102	0,997131931166348	0,999391463096584	1	1	1	1	1	1	1	1	1	1	1	1	1	1	0,997980477953551	1	0,999507874015748	0,996794871794872	0,995503597122302	1	0,997624703087886	1	1	1	0,99702380952381	0,995951417004049	1	0,998628257887517	1	1	1	1	1	1	1	1
Molecular Medicine	0,999852811304092	0,999735729386892	1	0,99931129476584	1	0,999935174380915	1	1	1	1	1	0,998934469898775	0,999822836389406	1	1	1	1	1	1	1	1	1	1	1	1	1	1	0,999637286906057	1	0,999873609706775	1	1	1	1	1	1	1	1	1	1	1	1	1	1	1	1	1	1	1
Physiology	0,999171728326891	0,9983463264824	0,998262380538662	0,993729096989967	0,996086105675147	0,999306911977821	0,995677050222505	0,999085086916743	0,997211525693799	0,994981179422836	0,990665110851809	0,985658409387223	0,99837980728234	1	1	1	1	0,998447204968944	1	1	1	1	1	1	1	1	1	0,998441396508728	1	0,999402128422815	0,998175182481752	0,998519615099926	1	0,995419847328244	1	1	1	0,995584988962472	0,998628257887517	1	0,985507246376812	1	1	1	1	1	1	1	1
Structural Biology	1	0,999734466277217	1	0,999769585253456	0,99906103286385	1	0,999730603448276	1	1	1	1	0,999462365591398	0,999911284599006	1	1	1	1	1	1	1	1	1	1	1	1	1	1	1	1	1	1	1	1	1	1	1	1	1	1	1	1	1	1	1	1	1	1	1	1
Business, Management and Accounting (all)	1	0,9997425997426	1	0,999775734469612	1	0,999935596058479	1	1	1	1	1	1	0,999912211394961	1	1	1	1	1	1	1	0,996491228070175	1	1	1	1	1	1	1	1	0,999750374438342	1	1	1	0,996699669966997	0,993865030674847	1	1	1	1	1	1	1	0,992248062015504	0,994011976047904	1	1	1	1	1
Business, Management and Accounting (miscellaneous)	1	1	1	1	1	0,999935220573946	1	1	1	1	1	1	1	1	1	1	1	1	1	1	1	1	1	1	1	1	1	1	1	1	1	1	1	1	1	1	1	1	1	1	1	1	0,994011976047904	0,974358974358974	1	1	1	1	1
Accounting	1	1	1	1	1	0,999935258319306	1	1	1	1	1	1	1	1	1	1	1	1	1	1	1	1	1	1	1	1	1	1	1	0,999873928391326	1	1	1	1	1	1	1	1	1	1	1	1	1	1	0,979166666666667	1	1	0,996478873239437	1
Business and International Management	0,999856052972506	1	0,999500748876685	0,999778319663046	1	0,999871613814354	1	0,998938428874735	1	1	1	1	1	1	1	1	1	1	1	1	1	1	1	1	1	1	1	1	1	0,999876007439554	1	1	1	1	1	1	1	1	1	1	1	1	1	1	1	1	1	0,997601918465228	1
Management Information Systems	1	1	1	1	1	0,999935471381558	1	1	1	1	1	1	1	1	1	1	1	1	1	1	1	1	1	1	1	1	1	0,99964639321075	1	0,999874733809345	1	1	1	1	1	1	1	1	1	1	1	1	1	1	1	1	0,98989898989899	1	1
Management of Technology and Innovation	0,999714367323622	0,999749561733033	0,999514327343371	0,99934282584885	1	0,999936040933802	1	0,998969072164948	0,999726177437021	1	1	1	0,999739062364095	0,996923076923077	1	1	1	0,999407582938389	1	1	1	1	1	1	1	1	1	0,999662845583277	1	0,999876862455363	1	1	1	1	1	1	1	1	1	1	1	1	1	1	0,996478873239437	0,997601918465228	1	0,991561181434599	1
Marketing	1	1	1	1	1	1	1	1	1	1	1	1	1	1	1	1	1	1	1	1	1	1	1	1	1	1	1	1	1	1	1	1	1	1	1	1	1	1	1	1	1	1	1	1	1	1	1	1	1
Organizational Behavior and Human Resource Management	1	1	1	1	1	1	1	1	1	1	1	1	1	1	1	1	1	1	1	1	1	1	1	1	1	1	1	1	1	1	1	1	1	1	1	1	1	1	1	1	1	1	1	1	0,982758620689655	1	1	1	1
Strategy and Management	0,999737876802097	0,999350508768132	0,999255398361876	0,999422299248989	0,999479166666667	0,999138461538462	0,99987922705314	0,999221183800623	0,999621737485815	0,999153976311337	1	0,999263080324245	0,999422489893573	1	1	1	1	1	1	1	1	1	1	1	1	1	1	0,999721758486366	1	0,99851207508298	1	0,999423298731257	1	1	1	1	1	1	1	1	1	1	0,998992950654582	1	0,99890350877193	0,999043062200957	1	0,999091734786558	1
Tourism, Leisure and Hospitality Management	0,999723947550034	0,999763928234183	1	0,999584113121231	0,999348534201954	0,999432892249527	0,999619916381604	1	0,998274946921444	1	1	0,999570815450644	0,999147703059746	1	0,998283261802575	1	1	1	1	1	1	1	1	1	0,998003992015968	1	1	1	1	0,999162479061977	1	1	1	1	1	1	1	1	1	1	1	1	1	1	1	1	1	1	1
Industrial Relations	1	1	1	1	1	0,999935512994132	1	1	1	1	1	1	1	1	1	1	1	1	1	1	1	1	1	1	1	1	1	1	1	0,999874890529213	1	1	1	1	1	1	1	1	1	1	1	1	1	1	0,993589743589744	1	1	1	1
Chemical Engineering (all)	0,999113671615333	0,999335548172757	0,999755441428222	0,999545109931766	0,999698976520169	0,999376947040498	0,999379973132169	0,998739601714142	0,999785729590744	0,999613003095975	1	0,999514091350826	0,999408371542671	1	1	1	1	1	1	1	1	1	1	1	1	1	1	0,999198878429802	1	0,998717822270441	0,999141999141999	0,995517130963817	1	0,999590331831217	1	1	1	0,999628666914222	0,999602069239952	1	1	1	0,999582463465553	1	1	1	1	0,998800479808077	1
Chemical Engineering (miscellaneous)	0,999854035907167	1	1	1	1	1	1	1	1	1	1	1	1	1	1	1	1	1	1	1	1	1	1	1	1	1	1	1	1	1	1	0,99895178197065	1	1	1	1	1	1	1	1	1	1	1	1	1	1	1	1	1
Bioengineering	0,999163763066202	0,998318924111431	0,999552772808587	0,999156296140055	1	0,9997469795686	0,999616711383672	0,999055266887104	0,999732656062024	1	1	0,999116217410517	0,99931442282972	1	1	1	1	1	1	1	1	1	1	1	1	1	1	0,998726114649682	1	0,999879489033502	1	0,995305164319249	1	0,998299319727891	1	1	1	0,998809523809524	0,995440729483283	1	1	1	1	1	1	1	1	1	1
Catalysis	1	1	1	1	1	1	1	1	1	1	1	1	0,999912372940764	1	1	1	1	1	1	1	1	1	1	1	1	1	1	1	1	1	1	1	1	1	1	1	1	1	1	1	1	1	1	1	1	1	1	1	1
Chemical Health and Safety	1	1	1	1	1	1	1	1	1	1	1	1	1	1	1	1	1	1	1	1	1	1	1	1	1	1	1	1	1	1	1	1	1	1	1	1	1	1	1	1	1	1	1	1	1	1	1	1	1
Colloid and Surface Chemistry	0,999859943977591	1	1	1	1	1	1	1	1	1	1	1	0,999656150606035	1	1	1	1	1	1	1	1	1	1	1	1	1	1	1	1	0,999878905303948	1	0,997582594681708	1	1	1	1	1	1	1	1	1	1	1	1	1	1	1	1	1
Filtration and Separation	1	1	0,999486916367368	1	1	0,999806738388198	0,999734783185254	1	1	1	1	1	1	1	1	1	1	1	1	1	1	1	1	1	1	1	1	1	1	0,999625421400924	1	1	1	1	1	1	1	1	1	1	1	1	1	1	1	1	1	1	1
Fluid Flow and Transfer Processes	0,999607740585774	0,998921484037964	0,999630450849963	0,999424405218726	0,998968008255934	0,9984622954853	0,999276585483482	1	0,99911905361188	1	1	0,999268203439444	0,999176073164703	1	0,999363057324841	1	1	0,999571734475375	1	1	1	1	1	1	1	1	1	1	1	0,997943092218032	1	1	1	0,999054820415879	1	1	1	0,999236641221374	0,999115044247788	1	1	1	1	1	1	1	1	1	1
Process Chemistry and Technology	0,999857285571571	1	1	1	1	0,999872106407469	1	0,999485861182519	1	1	1	1	0,999913066156655	1	1	1	1	1	1	1	1	1	1	1	1	1	1	1	1	0,999876923076923	1	0,99819657348963	1	1	1	1	1	1	1	1	1	1	1	1	1	1	1	1	1
Chemistry (all)	0,995093307593308	0,995764058032405	0,999337221633086	0,997607893949965	0,999114521841795	0,99548264384213	0,996257542198121	0,9973013088652	0,998512836568566	0,999172048352376	0,999344692005242	0,998810782241015	0,996218611521418	0,999828001375989	0,999531981279251	0,999828326180258	1	0,999581881533101	1	1	0,99965992178201	1	1	1	1	1	1	0,995724465558195	1	0,996238938053097	0,999654576856649	0,996348143639683	1	0,998982188295165	1	1	1	0,999674849617948	0,998994469582705	0,999652294853964	0,999838917525773	1	0,999658294891509	1	1	0,999830680663732	1	0,999832271049983	0,999826056705514
Chemistry (miscellaneous)	1	1	1	1	1	1	1	1	1	1	1	1	1	1	1	1	1	1	1	1	1	1	1	1	1	1	1	1	1	1	1	1	1	1	1	1	1	1	1	1	1	1	1	1	1	1	1	1	1
Analytical Chemistry	0,99935880995127	0,998746605389597	0,999650104968509	0,998507184176152	1	0,998293411348815	0,998103366524419	0,998172514619883	0,999506233798297	1	1	0,9996534996535	0,99894188507244	1	1	1	1	0,998389694041868	1	1	1	1	1	1	1	1	1	0,999202763752325	1	0,998540637629097	1	0,998423541776143	1	1	1	1	1	0,999316005471956	1	1	0,999341238471673	1	1	1	1	1	1	0,999213836477987	1
Electrochemistry	1	1	1	0,999774926851227	1	1	1	1	1	1	1	1	0,999824160365746	1	1	1	1	1	1	1	1	1	1	1	1	1	1	1	1	0,999874953107415	1	1	1	1	1	1	1	1	1	1	1	1	1	1	1	1	1	1	1
Inorganic Chemistry	0,999854503128183	0,999741133833808	1	1	1	0,999871001031992	0,999867056633874	1	0,9998606271777	1	1	1	0,999824067558058	1	1	1	1	1	1	1	1	1	1	1	1	1	1	0,999647390691114	1	1	1	1	1	1	1	1	1	1	1	1	1	1	1	1	1	1	1	1	1
Organic Chemistry	0,999449111692604	0,999529743710322	1	1	1	0,999559471365639	0,999241274658574	0,999545867393279	1	1	1	1	1	1	1	1	1	1	1	1	1	1	1	1	1	1	1	0,999380037197768	1	0,999761364992244	0,998223801065719	0,998535871156662	1	1	1	1	1	1	1	1	1	1	1	1	1	1	1	1	1
Physical and Theoretical Chemistry	0,999455189321711	0,999307639049158	1	1	1	0,999937410026914	0,999874906179635	1	0,999869229763306	1	1	0,999588307945657	0,999915547673338	1	1	1	1	0,999507389162562	1	1	1	1	1	1	1	1	1	0,999092558983666	1	1	1	0,997231833910035	1	1	1	1	1	1	1	1	1	1	1	1	1	1	1	1	1
Spectroscopy	0,999594484995945	0,999316317228806	1	0,998991935483871	1	0,999126037830077	0,998631670605797	0,999572284003422	0,999740293468381	1	1	1	0,999242934051144	1	1	1	1	0,999040307101727	1	1	1	1	1	1	1	1	1	0,999702646446625	1	0,999647721935181	1	0,99866844207723	1	1	1	1	1	0,999056603773585	1	1	1	1	1	1	1	1	1	1	1
Computer Science (all)	0,999368367862557	0,998776758409786	0,999327731092437	0,999270206166758	0,999547306473517	0,998487415295257	0,999766573295985	0,99929996499825	0,99951332278866	1	1	0,999333999333999	0,999113332258585	0,999194847020934	0,99945652173913	1	1	1	1	1	0,999236641221374	1	1	1	1	1	1	0,999484801648635	1	0,99722653649878	1	1	1	0,999246987951807	0,999158249158249	1	1	1	1	1	1	1	0,998438719750195	1	1	0,999250374812594	0,998401278976819	0,997116077865898	1
Computer Science (miscellaneous)	0,999854946330142	1	1	0,999551267668836	1	0,999677876562299	0,99973481835057	1	0,999722029186935	1	1	0,999494438827098	0,999736564805058	1	1	1	1	1	1	1	1	1	1	1	1	1	1	0,999649982499125	1	0,999750343277993	1	1	1	1	1	1	1	1	1	1	0,998360655737705	1	1	1	1	1	0,995575221238938	1	1
Artificial Intelligence	0,999617004978935	0,999170468685193	0,999307958477509	0,999258710155671	1	0,998418683858411	0,99988213107025	0,999639379733141	0,999508237029752	1	1	1	0,999107215323431	0,998269896193772	0,999430199430199	1	1	1	1	1	1	1	1	1	1	1	1	0,999736703528173	1	0,997649166013657	1	1	1	1	1	1	1	1	1	1	1	1	1	1	1	1	0,998284734133791	0,998466257668712	0,999084249084249
Computational Theory and Mathematics	0,999444752915047	0,999761734572314	1	0,99958071278826	1	0,999557885429167	0,999363219561895	1	0,999866826474897	1	1	0,999563509384548	0,99965811965812	1	0,999112688553682	1	1	1	1	1	1	1	1	1	1	1	1	0,999684542586751	1	0,999278846153846	1	1	1	1	1	1	1	1	1	1	1	1	1	1	1	1	0,998144712430427	1	1
Computer Graphics and Computer-Aided Design	0,999570138988394	0,99974817426341	1	1	1	0,999807827813721	1	1	1	1	1	1	1	1	1	1	1	1	1	1	1	1	1	1	1	1	1	0,999660326086957	1	0,999505928853755	1	1	1	1	1	1	1	1	1	1	1	1	1	1	1	1	0,996805111821086	1	1
Computer Networks and Communications	0,999107711918419	0,999793431109275	1	0,998705860602699	1	0,998785228377065	0,9995292456161	0,997844827586207	0,9987721021611	1	1	1	0,998702562439183	0,999147485080989	0,999435347261434	1	1	1	1	1	1	1	1	1	1	1	1	1	1	0,998101195130124	1	1	1	1	1	1	1	1	1	1	1	1	1	1	1	1	0,998307952622673	0,999242997728993	0,999097472924188
Computer Science Applications	0,998618637764318	0,998907444982051	0,998882681564246	0,998710416965181	1	0,996888888888889	0,998707753479125	0,99954128440367	0,998249047275724	1	1	0,999334073251942	0,997479294202377	0,999635701275046	0,999700867484296	1	1	0,999756572541383	1	1	1	1	1	1	1	1	1	0,998884965619773	1	0,996191201675871	1	1	1	1	1	1	1	1	1	1	1	1	1	1	1	0,999294781382228	0,998546511627907	0,99896229678312	0,999253452780888
Computer Vision and Pattern Recognition	0,999857813166501	1	1	0,999782466826191	1	0,999808465811147	0,999869825566259	1	1	1	1	1	0,999739741476533	1	1	1	1	1	1	1	1	1	1	1	1	1	1	1	1	0,99963185666953	1	1	1	1	1	1	1	1	1	1	1	1	1	1	1	1	1	0,998011928429423	1
Hardware and Architecture	0,999857509261898	1	1	1	1	0,999616490891659	0,999869570888222	0,999488752556237	0,999726738625495	1	1	1	0,999739402362752	1	1	1	1	1	1	1	1	1	1	1	1	1	1	0,999664542099966	1	0,999385145105755	1	1	1	1	1	1	1	1	1	1	1	1	1	1	1	1	1	0,997950819672131	1
Human-Computer Interaction	0,999855824682814	1	1	0,999777777777778	1	0,999807272260054	1	0,999466382070438	0,999861840287372	1	1	1	0,999825037179599	1	1	1	1	1	1	1	1	1	1	1	1	1	1	1	1	0,999627421758569	1	1	1	1	1	1	1	1	1	1	1	1	1	1	1	0,997142857142857	0,996268656716418	0,997536945812808	0,994818652849741
Information Systems	0,999037304452467	0,999434495758718	0,999110056363097	0,998978897208986	1	0,997871585668677	0,99944208881946	0,999385371850031	0,998489601487162	0,998928762720943	1	1	0,997966843916171	0,999389871873093	0,997760859829825	0,999393939393939	1	0,999	1	1	1	1	0,999360204734485	1	1	1	1	0,99929873772791	1	0,997450063748406	1	1	1	1	1	1	1	1	1	1	1	1	1	0,999370673379484	1	0,999422299248989	0,996960486322188	0,999440402909905	0,999364675984752
Signal Processing	0,999717434303476	0,999754239370853	1	0,99978462201163	1	0,999490575649516	0,999741167335318	1	1	1	1	1	0,999740775944008	1	1	1	1	0,999433106575964	1	1	1	1	1	1	1	1	1	1	1	0,999023199023199	1	1	1	1	1	1	1	1	1	1	1	1	1	1	1	1	1	0,998178506375228	1
Software	0,998300509847046	0,998142060883236	0,998816568047337	0,998547471279546	0,999303297724106	0,995205516349728	0,998686062881276	0,999192571659265	0,998350315380883	1	1	0,999804036841074	0,997929034930278	0,99940119760479	0,999237998475997	1	1	1	1	1	1	1	1	1	1	1	1	0,998661087866109	1	0,993857271906052	1	1	1	1	1	1	1	1	1	1	1	1	0,999704229517894	0,99969614099058	1	0,999708709583455	0,999104210212004	0,999713384924047	1
Decision Sciences (all)	0,99874213836478	0,998070429329474	0,999098286744815	0,999576809140923	0,99931129476584	0,998795715281739	0,998204898063854	0,999047619047619	0,9997320471597	1	1	0,999554962171785	0,999570999571	1	1	0,997983870967742	1	1	1	1	0,998191681735985	1	1	1	1	1	1	0,997435075344662	1	0,999033115784385	1	0,999210110584518	1	1	1	1	1	1	1	1	0,998862343572241	1	1	1	1	1	1	1	1
Decision Sciences (miscellaneous)	1	1	1	1	1	0,999935275080906	1	1	1	1	1	1	1	1	1	1	1	1	1	1	1	1	1	1	1	1	1	1	1	0,999873991935484	1	1	1	1	1	1	1	1	1	1	1	1	1	1	1	1	0,993333333333333	1	0,986666666666667
Information Systems and Management	0,999863518493244	1	0,999160369437448	0,999386377582328	1	0,999623918766454	0,999623777276147	0,998231653404067	0,999344262295082	1	1	1	0,999492299881537	1	0,999198075380914	1	1	0,999502982107356	1	1	1	1	1	1	1	1	1	0,999696048632219	1	0,999407653121668	1	1	1	1	1	1	1	1	1	1	1	1	1	1	1	0,997297297297297	0,995433789954338	0,99748743718593	1
Management Science and Operations Research	1	0,999747091552858	0,99950495049505	1	1	0,999743474636055	0,999868645737554	1	1	1	1	1	0,999912739965096	1	1	1	1	1	1	1	1	1	1	1	1	1	1	1	1	0,999504889218963	1	1	1	1	1	1	1	1	1	1	1	1	1	1	1	0,997354497354497	1	0,995381062355658	1
Statistics, Probability and Uncertainty	0,99934929724102	0,998930252460419	0,999270871308786	0,999619120167587	0,999494183105716	0,998281470570183	0,999279884781565	1	0,999499186177539	1	1	1	0,999343023733268	1	1	1	1	1	1	1	1	1	1	1	1	1	1	0,998629010145325	1	0,997837960855712	1	1	1	1	1	1	1	1	1	1	1	1	1	1	1	1	1	1	1
Earth and Planetary Sciences (all)	0,989327219543047	0,995726115216811	0,998543265028649	0,996181218538448	0,999042242161508	0,986276195275217	0,992428900845504	0,998779356476735	0,989413648970663	0,999947693273355	0,999791438552584	0,998982114294024	0,986754743689124	0,999841160586647	0,998818391985615	0,999894174294936	0,999946831135687	0,996680867928267	1	0,999946833962465	0,999683410721824	1	0,999946845266571	1	1	1	0,999946845266571	0,996644764434503	1	0,991992143234872	1	0,999644019528072	1	0,999947299077734	1	0,999946859389946	1	0,999791926758219	1	1	0,999688764394647	1	0,999735799207398	0,999946918626254	0,999893882315488	0,999894625922023	0,999788314987299	0,999632179076244	1
Earth and Planetary Sciences (miscellaneous)	0,991586283091829	0,99680464778504	0,998614146367464	0,99575571799104	0,999278058532793	0,985008624745178	0,993726267128942	0,998820185552636	0,988850555368563	0,999942132978416	1	0,9987760749255	0,986244792414883	0,999941355852686	0,998752056270917	0,999824160365746	1	0,997113761367968	1	1	0,999883170745955	1	1	1	1	1	1	0,997403655246144	1	0,990985503715434	1	0,999887842081651	1	0,999941650134205	1	1	1	1	1	1	0,999828021096079	1	0,999882979345855	1	0,999941214508259	0,999883334305547	0,999941390223889	0,999825561111757	1
Atmospheric Science	0,987708042180155	0,996488178025035	0,99925669900026	0,9957009792214	0,999311452834519	0,980646297880908	0,994651745138653	0,998842333258645	0,982575422174435	0,999960662444436	0,999921519384712	0,998737045429219	0,982741258741259	0,999920606565837	0,999418063314711	0,99984126984127	1	0,998453705449745	1	0,999960178400765	0,999643592586726	1	1	1	1	1	1	0,995923667977346	1	0,992486943774242	0,999920534011443	0,999922993993531	1	0,999920876686316	1	1	0,999960195836485	0,999725748315311	0,999960552268245	1	0,999648135116115	1	0,999881093935791	0,999920448669504	0,999920477137177	0,999723079357544	0,999920638069918	0,999763173475429	0,999960202172961
Computers in Earth Sciences	0,997167138810198	0,997857361493725	0,999349381912817	0,99859392575928	1	0,995083144577648	0,996855036855037	0,999332294680614	0,996948118006104	1	1	0,999353308902781	0,993915097716372	1	0,999424626006905	1	1	0,998347497639282	1	1	1	1	1	1	1	1	1	0,998185447287244	1	0,995389103227628	1	0,999726775956284	1	0,999662731871838	1	1	1	1	1	1	1	1	0,999657416923604	1	1	1	0,999653859466944	0,999339061467284	1
Earth-Surface Processes	0,990759841842874	0,99519018404908	0,997512572324663	0,993159203980099	0,998534881099966	0,984602251169849	0,987156887433896	0,998041881968996	0,988173735483048	0,999588888236331	0,999765999766	0,996703771749703	0,984243964421855	1	0,99763852090773	0,999643069601428	0,999940202116845	0,994075632578484	1	1	0,999822169531713	1	0,999940219990435	1	0,999940252135986	1	0,999940219990435	0,996801485761453	1	0,992134048916383	1	0,999601797599408	1	0,999881579726449	1	1	1	0,999824970828471	0,999823113207547	1	0,999243570347958	1	0,999940631678936	1	1	1	0,999762060555589	0,999823008849558	1
Economic Geology	0,999436540357797	0,999755620723363	1	0,999785683669096	1	0,999618539004387	0,99896694214876	1	0,999864937871421	1	1	1	0,9993961352657	1	0,999021526418787	1	1	0,998880179171333	1	1	1	1	1	1	1	1	1	0,999673735725938	1	0,999513204332481	1	1	1	1	1	1	1	1	1	1	1	1	0,997844827586207	1	1	1	1	1	1
Geochemistry and Petrology	0,993781524217508	0,998265845833695	0,999271743653766	0,997437169312169	0,999547920433996	0,989852800278721	0,994048406295464	0,99957881436243	0,991519674355495	1	0,999877705760059	0,999066196306288	0,990251655629139	1	0,998583402195727	0,999873337555415	1	0,996418882257189	1	1	0,999748459313294	1	1	1	1	1	1	0,997810149481101	1	0,995129766100609	1	0,999307159353349	1	0,999749027481491	1	1	1	0,999878375091219	1	1	0,999637506041566	1	0,99987380111055	1	1	1	1	0,999875498007968	1
Geology	0,99145239262944	0,996827914353688	0,999258788648878	0,998408710217755	0,999539170506912	0,991061648337204	0,989046435051408	0,99946397941681	0,995283018867924	1	1	0,99809745270056	0,989299662939383	0,999740764744005	0,995651648749849	0,999741133833808	1	0,989876515741462	1	1	0,999743029680072	1	1	1	1	1	1	0,99690102653496	1	0,994164559424237	1	0,999882311404025	1	0,999871827736478	1	1	1	0,999751645349559	0,999872999746	1	0,999629995066601	1	0,999871067560598	1	1	1	1	1	1
Geophysics	0,990245997178087	0,997839207212577	0,999391780345816	0,997139588100686	0,999068814600987	0,987082189568868	0,994298142487656	0,999473314606742	0,989083891200772	1	0,99980144941924	0,998959417273673	0,98870765370138	1	0,998842592592593	0,999897875816993	1	0,996578734131629	1	1	0,999593743652245	1	1	1	1	1	1	0,996445593343566	1	0,993529916976811	1	0,999905320961939	1	0,999898652072565	1	1	1	0,999802332476774	0,999899386256163	1	0,9997051017399	1	0,999898177375013	1	1	0,999898713663527	1	0,999899284922953	1
Geotechnical Engineering and Engineering Geology	0,997169568573634	0,998615916955017	0,998367225768146	0,999243161422857	0,999832775919732	0,996890577957653	0,998214140758178	0,999547306473517	0,998580612841279	1	1	0,999852398523985	0,99571933742788	1	0,999821778649082	1	1	0,998743915842361	1	1	0,99980318834875	1	1	1	1	1	1	0,999084728033473	1	0,996002821537738	1	0,997924952446827	1	0,999803883114336	0,999798346440815	1	1	0,999626168224299	0,999419616947185	0,999798061389338	1	1	0,999802097763705	1	0,999798873692679	1	0,999601752289924	0,999030444056622	1
Oceanography	0,991000241604252	0,996262093227792	0,999489578902595	0,997329773030708	0,998907302859224	0,984407567740901	0,989283634245777	0,999570372916309	0,990442835094384	0,999707402711402	0,999806163985268	0,99847081811231	0,99009193540704	1	0,998114097123998	0,999701046337818	0,99989944695827	0,995059114169755	1	1	0,999702734839477	1	1	1	1	1	1	0,996594059405941	1	0,994187358916479	0,999900029991003	0,999537165602148	1	0,999901107594937	1	1	1	0,9997104806022	0,999705362404243	1	0,999712036859282	1	1	0,999899759422614	1	0,999802312938618	1	0,999901710241793	1
Paleontology	0,992280876494024	0,997364664543757	0,999582985821518	0,998348642790794	0,99968886123211	0,990474801963357	0,989172528254169	0,999717394376148	0,990098206314423	0,999648506151142	0,999826238053866	0,996945717062335	0,991941347552109	1	0,996357012750455	0,999451654176567	1	0,989788367618766	1	1	0,999819168173599	1	0,999814333457111	1	1	1	1	0,997029702970297	1	0,995986672724519	1	0,999839820599071	1	1	1	1	1	0,999482580200069	0,99982206405694	1	0,999829234972678	1	1	1	1	1	1	1	1
Space and Planetary Science	0,994189473684211	0,998205875756896	0,999571244819208	0,998208829417343	0,99967902423367	0,991075806609787	0,99465112565863	0,999709302325581	0,990936058009229	1	1	0,999145542580461	0,992276572269217	1	0,998291766313632	0,999810462471569	1	0,995606060606061	1	1	0,999812488280517	1	1	1	1	1	1	0,9974641815646	1	0,995385325334564	1	1	1	1	1	1	1	1	1	1	1	1	1	1	1	1	1	1	1
Stratigraphy	0,998211319790469	0,999585835576724	0,999654696132597	0,999444650129582	0,999530295913574	0,998662695276883	0,995385161519347	0,999640028797696	0,999508539132572	1	1	0,998630605956864	0,99853884243851	0,999139414802065	0,996581196581197	0,999147485080989	1	0,99000399840064	1	1	1	1	1	1	1	1	1	0,999473961073119	1	0,998658768302224	1	0,998970133882595	1	0,999198717948718	1	1	1	0,999333333333333	0,999242424242424	1	1	1	1	1	1	1	1	1	1
Economics, Econometrics and Finance (all)	0,999853608549261	0,999476439790576	1	0,999772468714448	1	0,999935329496217	1	1	1	1	1	1	0,999911715370354	1	1	1	1	1	1	1	1	1	1	1	1	1	1	0,999283924095954	1	0,999874198012329	1	1	1	1	1	1	1	1	1	1	1	1	1	0,990291262135922	0,991071428571429	1	1	1	1
Economics, Econometrics and Finance (miscellaneous)	1	0,999739651132518	0,999475616151023	0,999546896239239	0,999122807017544	0,999870817723808	0,999866666666667	1	1	1	1	1	0,999911870979113	1	1	1	1	0,999348958333333	1	1	1	1	1	1	1	1	1	1	1	0,999748995983936	1	1	1	1	1	1	1	1	1	1	1	1	1	1	1	1	1	1	1
Economics and Econometrics	0,999102103642894	0,999164752557945	1	0,998133283554228	0,998563906175203	0,998537566266529	0,999289604546531	0,998538545853124	0,999382716049383	1	1	0,9996534996535	0,999023358020672	1	0,99883788495061	1	1	1	1	1	1	1	1	1	1	1	1	0,999202763752325	1	0,997978209592272	1	0,999475065616798	1	1	1	1	1	1	1	1	1	1	0,99914089347079	0,999068901303538	0,996296296296296	1	0,999118165784832	0,998426435877262	0,999055712936733
Finance	1	1	1	1	1	0,999870984389111	1	1	1	1	1	1	1	1	1	1	1	1	1	1	1	1	1	1	1	1	1	1	1	0,999874827888346	1	1	1	1	1	1	1	1	1	1	1	1	0,995708154506438	0,985915492957746	0,986754966887417	1	1	0,997067448680352	1
Energy (all)	0,999344606108271	0,999134199134199	0,999628114540721	0,999422521655438	1	0,999076979878161	0,999758483274967	0,99883223043986	0,999747920342828	1	1	1	0,999670130298532	0,998952879581152	0,998711340206186	1	1	1	1	1	1	1	1	1	1	1	1	0,999165275459099	1	0,998512415608193	1	0,998269896193772	1	1	1	1	1	1	1	1	1	1	1	1	1	0,999044890162369	0,998963730569948	0,997275204359673	1
Energy (miscellaneous)	0,999853264856933	1	1	0,999771637360128	1	0,99993526251052	1	1	0,999859491358719	1	1	1	0,999823165340407	1	1	1	1	1	1	1	1	1	1	1	1	1	1	1	1	1	1	1	1	1	1	1	1	1	1	1	1	1	1	1	1	1	1	1	1
Energy Engineering and Power Technology	0,997905101078873	0,998319584479071	0,999783643444396	0,999438754033955	1	0,998789679265005	0,999216300940439	1	0,999290204826607	1	1	0,999784946236559	0,998860966754467	1	1	1	1	1	1	1	0,999661705006766	1	1	1	1	1	1	0,999457210059707	1	0,998124706985467	0,999301675977654	0,998088998088998	1	1	1	1	1	1	1	1	1	1	0,999658469945355	1	1	1	1	0,999011206328279	1
Fuel Technology	0,999205989110708	0,999655825159181	1	1	1	0,999770786774397	0,999788806758184	1	1	1	1	1	0,999474158653846	1	1	1	1	1	1	1	1	1	1	1	1	1	1	0,999791013584117	1	0,999597464023347	0,999056603773585	0,99622641509434	1	1	0,999521531100478	1	1	1	0,999565595134665	1	1	1	0,999542124542125	1	1	1	1	0,99825251201398	1
Nuclear Energy and Engineering	0,999714244892127	0,999749373433584	1	0,999780893952673	1	0,999616049145709	0,999869263956073	1	0,999726064922613	1	1	1	0,99991301322199	1	1	1	1	1	1	1	1	1	1	1	1	1	1	0,999662504218697	1	0,999383781119053	0,996655518394649	0,99909338168631	1	1	1	1	1	1	1	1	1	1	1	1	1	1	1	1	1
Renewable Energy, Sustainability and the Environment	0,994177310293013	0,997265268915223	0,998610628690518	0,997455470737914	0,999199199199199	0,994175767030681	0,998412838374041	0,99840397233552	0,995530420505336	0,999295443870362	1	0,999136292969425	0,995905969360803	0,999751922599851	0,999567847882455	1	1	1	1	1	0,999511957052221	1	1	1	1	1	1	0,997295266716754	1	0,993533015656909	0,999750499001996	0,998751820262118	1	0,999757104687879	1	1	1	0,99977111467155	0,999761279541657	1	0,999774011299435	1	0,999754360108082	1	1	0,999757458161533	1	0,99904214559387	0,999747856782653
Engineering (all)	0,99734627340966	0,997546373540092	0,998306315025405	0,996838385716942	0,999200745970428	0,994571717729322	0,997108364056965	0,99840471223463	0,997405677859314	0,999704709877455	0,999707474038321	0,998674219597445	0,996432009967718	0,999694376528117	0,999439775910364	1	1	0,999114148316882	1	1	0,999848782700741	1	1	1	1	1	0,999845416602257	0,998692098092643	1	0,993826294373509	1	0,999726962457338	1	1	1	1	0,999845583693638	1	1	1	0,999711732487749	1	0,999696233292831	1	0,999846248462485	1	0,999389499389499	0,999551636526678	1
Engineering (miscellaneous)	0,998909636091045	0,999076425767721	0,999583333333333	0,999796251018745	1	0,999311035951397	0,999499374217772	0,999561787905346	0,999738391105298	1	1	1	0,999746578813989	1	1	1	1	0,999013806706114	1	1	1	1	1	1	1	1	1	0,999092284417549	1	0,999290528556226	1	1	1	1	1	1	1	1	1	1	1	1	1	1	1	1	1	1	1
Aerospace Engineering	1	0,999749373433584	1	1	1	0,999616049145709	0,999869263956073	1	0,999863051218844	1	1	1	0,999738994257874	1	1	1	1	1	1	1	1	1	1	1	1	1	1	1	1	0,999260446197461	1	1	1	1	1	1	1	1	1	1	1	1	1	1	1	1	1	1	1
Automotive Engineering	1	1	1	0,999773550724638	1	0,9998708260673	0,999866684442074	1	0,999860218059827	1	1	1	0,999911878745153	1	1	1	1	1	1	1	1	1	1	1	1	1	1	1	1	0,999749027481491	1	1	1	1	1	1	1	1	1	1	1	1	1	1	1	1	1	1	1
Biomedical Engineering	0,999372174786539	0,998586429725363	0,996350364963504	0,995461147421932	0,999556933983163	0,997887238923095	0,998954582413753	0,994465582843307	0,997697527872031	0,998682476943347	1	0,998359580052493	0,997264902260478	1	1	1	1	1	1	1	1	1	1	1	1	1	1	0,998471726948548	1	0,996687644915535	1	0,997095837366893	1	1	1	1	1	0,999385749385749	0,998617829993089	1	1	1	1	1	1	1	1	0,999304589707928	1
Civil and Structural Engineering	0,995769316410599	0,996868422403614	0,992906990046905	0,995304695304695	0,999584125475285	0,989205484780706	0,998099762470309	0,997535110346804	0,994676872992829	0,999565055300112	0,999938134125216	0,999262243913512	0,992324888226528	0,999873976055451	0,99987855234394	0,999937035637829	1	0,999883943596588	1	1	0,999811758800276	1	1	1	1	1	0,999873369634038	0,998431075524778	1	0,990100699778119	1	0,999579478553406	1	0,999874655302081	1	1	1	1	0,999937613076299	1	1	1	0,999937150399095	0,999936792870236	1	0,999686697161476	0,999874055415617	0,999562855180166	1
Computational Mechanics	0,999854524294443	1	1	1	1	0,999806501547988	0,999867074305463	1	1	1	1	1	1	1	1	1	1	1	1	1	1	1	1	1	1	1	1	1	1	0,999499311553386	1	1	1	1	1	1	1	1	1	1	1	1	1	1	1	1	1	1	1
Control and Systems Engineering	0,999481798160384	0,999575461685417	0,999279798343536	0,999432248296745	1	0,998591721773206	0,999282811379393	0,999624060150376	0,99962602842184	1	1	1	0,999016957483411	1	1	1	1	1	1	1	0,99910071942446	1	1	1	1	1	1	0,999457111834962	1	0,997391698797913	1	0,999452054794521	1	1	1	1	1	0,999276410998553	0,998334721065778	0,998982706002035	1	1	1	1	1	0,999119718309859	0,999051233396584	0,998320738874895	1
Electrical and Electronic Engineering	0,99777753083676	0,998333055509252	0,99926326129666	0,998630970489808	1	0,996931295107121	0,998860929895413	0,999747219413549	0,997741935483871	1	1	0,999268292682927	0,996882654197284	1	0,999659632402995	1	1	0,999459751485683	1	1	0,999169090153718	1	1	1	1	1	1	0,998592964824121	1	0,995740043590252	1	1	1	1	1	1	1	1	1	1	0,999634235552304	1	1	0,999563318777293	1	1	0,999574468085106	0,99959807073955	1
Industrial and Manufacturing Engineering	0,999396062326368	0,998861047835991	0,999400838825644	0,999315537303217	0,999611197511664	0,998697762519238	0,999776060911432	0,998756991920448	0,999767008387698	0,999454743729553	1	0,999702999703	0,999295278365046	1	1	1	1	1	1	1	1	1	1	1	1	1	1	0,999057270798963	1	0,997547712975797	0,99936788874842	0,997480050398992	1	0,999408633944412	1	1	1	1	0,999432785025525	1	0,999499749874938	1	1	1	1	1	1	1	1
Mechanical Engineering	0,998311146433539	0,996168038603463	0,998440849736893	0,998165858771125	0,999313344014649	0,995653107223355	0,998787200298535	0,999601514245866	0,998456938952647	1	1	0,999031383184812	0,997041827187672	1	0,999750124937531	1	1	0,999790224459828	1	1	0,99971198156682	1	1	1	1	1	1	0,99933796756041	1	0,994433970733459	1	0,999761051373955	1	0,999426769848094	1	0,999699969997	1	0,999197860962567	0,998876088788986	0,999700867484296	1	0,999699248120301	1	1	1	1	0,999414005273953	0,999718468468468	1
Mechanics of Materials	0,999315911889451	0,99953509995351	1	0,999589827727646	1	0,999435276400828	0,999748775279487	1	1	1	1	1	0,999491697729583	1	0,99918896999189	1	1	1	1	1	1	1	1	1	1	1	1	0,99969474969475	1	0,999169139465875	1	0,999293785310734	1	1	1	1	1	1	1	1	1	1	1	1	1	1	0,996894409937888	1	1
Ocean Engineering	0,998581560283688	0,99739921976593	0,99952741020794	0,999406352033244	1	0,997692610726546	0,998471259682022	0,999756986634265	0,998097653772987	1	1	0,999530516431925	0,998094958968347	1	1	1	1	0,999481999481999	1	1	1	1	1	1	1	1	0,999587288485349	0,999026479750779	1	0,997858672376874	0,999596122778675	0,99969512195122	1	0,999613152804642	1	1	1	0,999647514980613	1	1	0,99965433805738	1	1	1	1	0,999614048629873	1	0,999244142101285	1
Safety, Risk, Reliability and Quality	0,997134670487106	0,998165137614679	0,998559308468065	0,998056476506231	0,9990882567469	0,995390304442531	0,998986229618991	0,998531571218796	0,996510207642645	1	1	0,999840840362884	0,996483600792788	1	0,999609222352481	1	1	0,999660037395886	1	1	1	1	1	1	1	1	1	0,998601985181043	1	0,994366887092824	1	0,999811391927575	1	1	0,999776136109246	1	1	0,999588307945657	0,999572466866182	1	1	1	0,999561403508772	1	1	0,999566348655681	0,999779298168175	0,999785821375027	1
Media Technology	0,999853929301782	1	1	0,999773242630385	0,999118942731278	0,999935392169531	1	0,999439461883408	1	1	1	1	0,999911832128372	1	1	1	1	1	1	1	1	1	1	1	1	1	1	1	1	0,999874434957308	1	1	1	1	1	1	1	1	1	1	1	1	1	1	1	0,996153846153846	1	0,996835443037975	0,990291262135922
Building and Construction	0,998915009041591	0,998865355521936	0,997613365155131	0,998976458546571	1	0,998817687396548	0,998881806999888	1	0,999069551058386	1	1	0,999409332545777	0,998983342457183	1	0,999550157444894	1	1	1	1	1	0,999409332545777	1	1	1	1	1	1	0,998826841858283	1	0,998298958111844	1	0,999584372402328	1	1	1	1	1	1	1	1	1	1	1	1	1	1	0,999388379204893	1	1
Architecture	0,999450473966204	0,999531725591196	0,996998284734134	0,99917406566178	0,998726114649682	0,999559969826502	0,999621642073401	1	0,999472365123335	1	1	0,998730964467005	0,999745244565217	0,998344370860927	1	1	1	1	1	1	1	1	1	1	1	1	1	0,999691833590139	1	0,999404478323011	1	0,99927797833935	1	1	1	1	1	1	1	1	1	1	1	1	1	1	1	1	1
Environmental Science (all)	0,992347368775916	0,995177750364472	0,995611386238273	0,994506299443305	0,99846740120951	0,986076382491512	0,992909906344809	0,997658457811869	0,991818880021371	0,9994878142473	0,999829794476831	0,997631948625326	0,988795765328628	0,999913830245584	0,999495755945878	0,999913871064984	1	0,998736962190352	1	0,999913532209252	0,999785177228786	1	1	1	0,999956792257172	1	0,999913547160024	0,996467665553917	1	0,991347342398022	1	0,998998706662773	1	0,999785343236165	0,999913629296942	0,999956784788245	1	0,99927761016445	0,999786004707896	1	0,999491396117657	1	0,999741891078035	0,999870460728011	0,999956840742339	0,9996995321286	0,999870795469228	0,999614577534153	1
Environmental Science (miscellaneous)	0,995934041111362	0,998467041389883	0,999492900608519	0,997981679863375	0,998740157480315	0,995988998395599	0,997688347168225	0,998953974895398	0,997054009819967	0,999590163934426	1	0,998487903225806	0,997228256798262	0,999095022624434	0,998574483250178	1	1	0,9977572189515	1	1	0,999561211057481	1	1	1	1	1	1	0,996484698097601	1	0,996389891696751	1	1	1	1	1	1	1	0,999215070643642	1	1	0,999231950844854	1	0,999555752998667	1	1	1	1	1	1
Ecological Modeling	0,996919545784006	0,995938561512332	0,997076274830166	0,99589031389499	0,999357149416843	0,990843662534986	0,995225340631187	0,996610464105684	0,997450492114313	0,999408983451537	0,999608533959679	0,998629550321199	0,995047383208724	1	0,99952480517012	1	1	0,999911433885395	1	1	0,999899959983994	1	1	1	0,999898590406653	1	1	0,997447758813208	1	0,99192401751692	0,99989904088844	0,99737876802097	1	0,999700359568518	0,99989872392141	1	1	0,999415261670403	0,999106965667791	1	0,999418435591742	1	0,999498193496588	0,999797509365192	1	0,999500798722045	1	0,999602898838479	0,999898610970293
Ecology	0,989976154729312	0,991725888324873	0,996979020979021	0,992903957029518	0,995610698191608	0,982922262396694	0,980142212972598	0,997467071935157	0,987195175246919	0,999024865919064	0,998785523439398	0,992312008978676	0,988917211570431	0,999691167387276	0,998270102600811	0,999691377075489	0,999937938310681	0,996743043254671	1	1	0,999261583902529	1	0,999937957562973	1	0,999875976683616	1	0,999937957562973	0,994179526886314	1	0,992990261920752	1	0,998879518782804	1	0,999754254469497	0,999876076584671	1	1	0,998485582747759	0,999632960176179	1	0,997825167643328	0,999937946013031	0,999938400887027	1	0,999876176324913	0,99950856932244	0,999814837674361	0,999632735508355	1
Environmental Chemistry	0,992200705791643	0,994383299243531	0,995468539209243	0,99384468186892	0,998476797732908	0,984269234436076	0,991467676179383	0,996669673211684	0,993216855087359	0,999345858923575	0,99945620649652	0,99727482838318	0,986247958269666	0,999926750659244	0,99964149996415	0,999963391418949	1	0,999232031277272	1	1	0,999853854585312	1	1	1	1	1	0,999963274450035	0,996716807933264	1	0,990393465255407	0,999890029325513	0,998002211836895	0,999963269054178	0,999598261568241	0,999926605504587	1	0,99996328388897	0,999529513951721	0,999562873378989	0,999963294670386	0,99920514488041	1	0,999853704922829	0,99992661627651	0,999963321596244	0,999744441604907	1	0,99978140483824	0,99996328928047
Environmental Engineering	0,99391486722004	0,994950312368498	0,995480264973779	0,993282821851522	0,998834539996468	0,985913820133973	0,992481639525095	0,996331037347271	0,993909759025561	0,999129993474951	0,999602356938871	0,997592267739827	0,988535599979013	0,999963476990504	0,999642461296435	0,999926980649872	0,999963368621561	0,999547527061362	1	1	0,999927132291325	1	0,999963375329622	1	0,999963387397942	1	1	0,997194201349456	1	0,989631204044118	0,999890330835313	0,997864920646217	0,99996336996337	0,999745083758194	0,999963404815926	0,999963382035227	0,999963384716781	0,99960300274289	0,999600406858471	1	0,999603803486529	1	0,999744656015175	0,999926817666215	0,999926841758724	0,999563016641783	0,999963490324936	0,999745658019039	1
Global and Planetary Change	0,987704679214498	0,995453591662587	0,999275303969724	0,994750302867142	0,998367978010651	0,988879384088965	0,989060922248401	0,998698552139255	0,991440310431408	0,999633666086638	0,999817933545744	0,99605061658741	0,990117299344232	0,999812944257389	0,996177437994488	0,999439199925227	0,999905767056163	0,992058184250125	1	1	0,999349139934914	1	0,999905811434492	1	0,999905891210239	1	1	0,995631543270317	1	0,992645055843094	1	0,999738493723849	1	0,999907227015493	1	1	1	0,999455831670597	0,999907842595153	1	0,998735777496839	1	0,99990682940464	0,999906041529644	1	0,999350589108452	0,999906568251892	0,999630928215538	0,999905908919834
Health, Toxicology and Mutagenesis	0,996010746560287	0,995906936665231	0,998780322536929	0,997264160502584	0,997425802543913	0,994098171872751	0,99597803387733	0,99834665197024	0,998176195384981	0,998979070954569	0,998315647633485	0,998108619292083	0,995643091614443	0,999823102777286	0,999840025595905	0,999823446327684	1	0,999714896650036	1	1	0,99965034965035	1	1	1	1	1	1	0,997098295248458	1	0,994918547302346	0,999466950959488	0,997194950911641	1	0,998953610045344	0,999821396677978	0,999820852740953	0,999820916905444	0,999331997327989	0,99879414298019	1	0,998509687034277	1	0,999824345687687	1	0,999821810406272	1	0,999646767926528	1	1
Management, Monitoring, Policy and Law	0,993975642525896	0,994375031111554	0,995767137595514	0,992825286019003	0,998340201465201	0,987278972140949	0,992398969638106	0,996072791636706	0,992717614804661	0,998805470943081	0,999762230279974	0,997589305281613	0,990711397661458	0,999879022501815	0,999240609848706	0,999879102943843	1	0,999720545495193	1	1	0,99975900710929	1	1	1	0,999939268796308	1	1	0,996073298429319	1	0,98945007476325	0,999939430648092	0,998785706025211	1	0,999699067108035	0,999939316706111	0,999939254039606	1	0,999288256227758	0,999820240877225	1	0,999468053667474	1	0,999517083182422	0,999817972210424	0,999939364540383	0,999096983926314	0,999939551471922	0,999220109184714	0,99993927617197
Nature and Landscape Conservation	0,995308768338451	0,993572822219672	0,996623605402231	0,992885631130753	0,994031830238727	0,993887711342239	0,988442129252808	0,996264196054991	0,993501624593851	0,997177798682973	0,998886414253898	0,994579548784061	0,994066382347487	0,999607766228672	0,99894607412612	1	1	0,999690498297741	1	0,999601514245866	0,999612928198181	1	1	1	0,999801311345122	1	1	0,9934997399896	1	0,994856207622165	0,999803033287374	0,998808510638298	1	0,999614271938284	1	1	1	0,998158040154725	0,999619554879209	1	0,998542008383452	1	0,999805447470817	1	1	0,999614717780774	1	0,999618829807509	1
Pollution	0,992851469420175	0,994426109277594	0,996693434104865	0,993456532681383	0,998460478872098	0,984981551733098	0,991105917486286	0,995963273705873	0,99456948442816	0,999332415404515	0,999459099608887	0,997052002672851	0,986977580556281	0,9999157965645	0,999630283859837	0,99991583554265	1	0,999362575196207	1	0,999957757783128	0,999958020234247	1	1	1	0,999915558370277	1	1	0,996616741427811	1	0,990367691766136	0,999789260726629	0,99693376941946	0,999957757783128	0,999328408327737	0,999873401696417	0,999957773836669	0,999915551239286	0,999293873312565	0,999288554090814	1	0,999046632124352	1	0,999831862126944	0,999957811247521	0,999957827260459	0,999454537825704	1	0,999581449857693	0,999957784532253
Waste Management and Disposal	0,993725926220069	0,99441617507993	0,996062410788994	0,993319562255527	0,998724815098189	0,98724101952601	0,992284130122911	0,995243521775752	0,994589296216428	0,999523380818726	0,999472184102185	0,997349172843748	0,989466910519542	0,999946415175222	0,999532516102223	1	1	0,999350422225553	1	1	1	1	1	1	0,999892438420996	1	1	0,996703400207215	1	0,990153047593603	0,999892692348964	0,996801155711485	0,999946184479604	0,999573128434982	0,999946259673259	0,999946210531978	0,999946216317969	0,999262653394428	0,999415204678363	1	0,999422450908327	1	0,999572078095748	1	0,999946297191343	0,999466524406508	0,999946443873179	0,999521327518349	0,999892449989245
Water Science and Technology	0,991210427332567	0,99512663968269	0,995749468683585	0,991982212639806	0,999076458076794	0,980397045902496	0,992719231316358	0,996370866820546	0,9871736262588	0,999660863667194	0,999830613742872	0,99831031951581	0,98106410032661	0,999929136313388	0,999367231002869	0,999844110936326	0,999971623155505	0,999248664292075	0,999971620739563	0,999985811980364	0,999886722455857	1	1	1	0,999971628791103	1	0,999971625168476	0,99746641285145	1	0,990349181806468	0,999971646488418	0,999102132435466	1	0,999900908807791	0,999971634022154	1	1	0,999774282288213	0,999773707658581	0,999985815804031	0,999675754927115	0,999985812181661	0,999858342895188	0,999957452843568	0,999943276893843	0,999546889823429	0,999844108727077	0,999603865144377	0,999971629596005
Immunology and Microbiology (all)	0,998274374460742	0,997719787180137	1	0,999558303886926	0,997603833865815	0,999551023026105	0,998421675654347	0,999474513925381	1	1	0,996545768566494	0,998534440644846	0,999912747578745	1	0,998870056497175	1	1	1	1	1	0,997183098591549	1	1	1	1	1	1	0,99657416923604	1	0,999381111523703	1	0,99718574108818	1	0,997319034852547	1	0,990697674418605	1	0,995184590690209	0,997752808988764	1	1	1	1	1	1	1	1	1	1
Immunology and Microbiology (miscellaneous)	1	1	1	1	1	1	1	1	1	1	1	1	1	1	1	1	1	1	1	1	1	1	1	1	1	1	1	1	1	1	1	1	1	1	1	1	1	1	1	1	1	1	1	1	1	1	1	1	1
Applied Microbiology and Biotechnology	0,999094671495085	0,99724342663274	0,999642090193271	0,997921390778534	0,999012833168806	0,999327628361858	0,998567335243553	0,994365138993238	0,999502301853926	1	0,999260901699926	0,998936170212766	0,998936344297169	1	0,999396863691194	1	1	1	1	1	1	1	1	1	1	1	1	0,997291440953413	1	0,999209039548023	1	0,990131578947368	1	1	1	1	0,998990918264379	0,996413199426112	0,996707818930041	1	0,998623537508603	1	1	1	1	1	1	1	1
Immunology	0,999562554680665	0,998439531859558	0,999478079331942	1	0,999129677980853	0,999935450555125	0,999866826474897	0,99944382647386	0,999860374197152	1	1	1	0,999823866138265	1	1	1	1	1	1	1	1	1	1	1	1	1	1	0,998226321390564	1	1	1	0,997920997920998	1	1	1	1	1	1	1	1	1	1	0,995495495495496	1	1	1	0,994791666666667	1	1
Microbiology	0,998803986710963	0,99689578713969	0,999613750482812	0,997443461160275	0,9978009895547	0,999195195938835	0,997672709456149	0,995938261575955	0,999744702578504	0,999077490774908	0,99738219895288	0,996934865900383	0,998167888074617	1	1	1	1	0,999549143372408	1	1	1	1	1	1	1	1	1	0,996556671449067	1	0,999074502545118	0,998798076923077	0,99075215782984	0,998709677419355	0,995735607675906	1	1	0,998727735368957	0,994102780117944	0,995044598612488	1	0,998397435897436	1	0,998882681564246	1	1	1	1	1	1
Parasitology	0,998059598059598	0,996431969552807	1	0,999164752557945	0,996695307336418	0,999747745475184	0,998092331171309	0,999076212471132	1	1	0,969474969474969	0,999567474048443	1	1	1	0,998217468805704	1	1	1	1	1	1	1	1	1	1	1	0,994645669291339	1	0,999760335530258	1	0,996987951807229	1	1	1	1	1	0,998873873873874	0,998587570621469	0,997955010224949	1	1	0,998305084745763	1	1	1	0,998214285714286	1	1
Virology	0,999142244460329	0,99824297188755	1	0,999780893952673	1	0,999872049133133	0,999738493723849	1	1	1	0,993464052287582	1	1	1	1	1	1	1	1	1	1	1	1	1	1	1	1	0,997293640054127	1	0,999876816949988	1	0,99909338168631	1	1	1	1	1	1	1	0,996168582375479	1	1	1	1	1	1	0,996987951807229	1	1
Materials Science (all)	0,998647319232661	0,997656707674282	0,999061326658323	0,999298614764159	1	0,999164727641549	0,99954483386436	1	0,999763117375341	1	1	1	0,999128919860627	0,99931693989071	0,999515033947624	1	1	1	1	1	1	1	1	1	1	1	1	0,998292266406441	1	0,99794416792902	1	0,999108734402852	1	1	1	1	1	1	1	1	1	1	1	1	1	1	0,99932157394844	0,999379652605459	1
Materials Science (miscellaneous)	0,9998542486518	0,99948051948052	1	0,999774011299435	1	0,999935454721487	1	1	1	1	1	1	0,999823881648468	1	1	1	1	1	1	1	1	1	1	1	1	1	1	0,999645892351275	1	0,999749310604161	1	1	1	1	1	1	1	1	1	1	1	1	1	1	1	1	1	1	1
Biomaterials	0,999856733524355	0,999748110831234	1	1	1	1	1	1	1	1	1	1	0,999738539306258	1	1	1	1	1	1	1	1	1	1	1	1	1	1	0,999660210669385	1	0,99987651271919	1	0,99722479185939	1	1	1	1	1	1	1	1	1	1	1	1	1	1	1	1	1
Ceramics and Composites	0,999853393930509	0,999737601679349	1	1	1	1	1	1	1	1	1	1	1	1	1	1	1	1	1	1	1	1	1	1	1	1	1	0,999640804597701	1	1	1	1	1	1	1	1	1	1	1	1	1	1	1	1	1	1	1	1	1
Electronic, Optical and Magnetic Materials	0,999330924662117	0,9993281075028	0,999605211212002	0,999603174603175	1	0,999503167308409	0,999630723781389	1	0,99935691318328	0,999027237354086	1	0,999609527528309	0,9989968232737	1	1	1	1	1	1	1	1	1	1	1	1	1	1	0,999418435591742	1	0,999417995576766	1	0,998733375554148	1	1	1	1	1	1	1	1	1	1	1	1	1	1	1	1	1
Materials Chemistry	0,999576390850042	0,999017440432326	1	0,999784853700516	0,999271667880554	0,999872733057588	0,99987068408121	0,999505440158259	1	1	1	1	0,999740887890827	1	1	1	1	1	1	1	1	1	1	1	1	1	1	0,999343401181878	1	0,999756127301549	1	0,998313659359191	1	1	1	1	1	1	1	1	0,99875	1	1	1	1	1	1	1	1
Metals and Alloys	1	0,999740932642487	1	1	1	1	0,999867003590903	1	1	1	1	1	0,99973600844773	1	1	1	1	1	1	1	1	1	1	1	1	1	1	1	1	1	1	1	1	1	1	1	1	1	1	1	0,998293515358362	1	1	1	1	1	1	1	1
Polymers and Plastics	0,999709175512578	0,99948280320662	1	1	1	1	1	1	1	1	1	1	0,999912080182873	1	1	1	1	1	1	1	1	1	1	1	1	1	1	0,999295774647887	1	0,999874937468734	1	0,998980632008155	1	1	1	1	1	1	1	1	1	1	1	1	1	1	1	1	1
Surfaces, Coatings and Films	0,9998588168855	0,999754480726737	1	1	1	1	1	1	1	1	1	1	0,999654457498272	1	1	1	1	1	1	1	1	1	1	1	1	1	1	0,999671700590939	1	0,999878063650774	1	0,999156829679595	1	1	1	1	1	1	1	1	1	1	1	1	1	1	1	1	1
Mathematics (all)	0,998966541790466	0,998520710059172	0,999643366619116	0,999811746987952	1	0,998103975535168	0,998927166527596	0,999255121042831	0,999254195152269	1	0,999266324284666	1	0,999346244994688	0,999065420560748	0,999400479616307	1	1	0,999588984792437	1	1	0,999121265377856	1	1	1	1	1	1	0,998381003777658	1	0,997399366802352	0,999044890162369	1	1	1	1	1	1	1	1	1	1	1	1	1	1	1	1	0,99835661462613	1
Mathematics (miscellaneous)	1	1	1	1	1	0,999935283458452	1	1	1	1	1	1	1	1	1	1	1	1	1	1	1	1	1	1	1	1	1	1	1	0,999874023683547	1	1	1	1	1	1	1	1	1	1	1	1	1	1	1	1	1	1	1
Algebra and Number Theory	1	1	1	1	1	0,999935123913326	1	1	1	1	1	1	1	1	1	1	1	1	1	1	1	1	1	1	1	1	1	1	1	0,999873417721519	1	1	1	1	1	1	1	1	1	1	1	1	1	1	1	1	1	1	1
Analysis	1	1	1	1	1	0,999935165975104	1	1	1	1	1	1	1	1	1	1	1	1	1	1	1	1	1	1	1	1	1	1	1	0,999873577749684	1	1	1	1	1	1	1	1	1	1	1	1	1	1	1	1	1	1	1
Applied Mathematics	0,998199063513027	0,999249530956848	0,999116867824551	0,999491955969517	0,999620060790274	0,997993153110613	0,99888678615162	1	0,9983781278962	1	0,999489274770174	0,999124087591241	0,998439937597504	1	1	1	1	1	1	1	1	1	1	1	1	1	1	0,999535423925668	1	0,997669491525424	1	0,999591169255928	1	1	1	1	1	0,999500748876685	1	1	1	1	1	1	1	1	1	1	1
Computational Mathematics	0,999719966395967	0,999758045003629	1	0,999787550456766	1	0,99949264332826	0,999614890885751	1	0,999596936719065	1	1	0,999550965424338	0,999570262140095	1	1	1	1	1	1	1	1	1	1	1	1	1	1	0,99967804249839	1	0,999394453191232	1	1	1	1	1	1	1	1	1	1	1	1	1	1	1	1	1	1	1
Control and Optimization	0,999855824682814	1	1	1	1	1	1	1	1	1	1	1	0,999825037179599	1	1	1	1	1	1	1	1	1	1	1	1	1	1	0,999655053466713	1	0,999875838092873	1	1	1	1	1	1	1	1	1	1	1	1	1	1	1	1	0,996268656716418	1	0,994818652849741
Discrete Mathematics and Combinatorics	0,999853522777208	1	1	1	1	0,999870617156165	0,999866238630284	1	1	1	1	1	1	1	1	1	1	1	1	1	1	1	1	1	1	1	1	1	1	0,999874134675897	1	1	1	1	1	1	1	1	1	1	1	1	1	1	1	1	1	1	1
Geometry and Topology	1	1	1	1	1	1	1	1	1	1	1	1	1	1	1	1	1	1	1	1	1	1	1	1	1	1	1	1	1	1	1	1	1	1	1	1	1	1	1	1	1	1	1	1	1	1	1	1	1
Logic	0,999852941176471	1	1	1	1	1	1	1	1	1	1	1	1	1	1	1	1	1	1	1	1	1	1	1	1	1	1	1	1	1	1	1	1	1	1	1	1	1	1	1	1	1	1	1	1	1	1	1	1
Mathematical Physics	1	1	1	1	1	0,999741752211247	1	1	0,999581005586592	1	1	1	0,999735775937995	1	1	1	1	1	1	1	1	1	1	1	1	1	1	1	1	0,999874655302081	1	1	1	1	1	1	1	1	1	1	1	1	1	1	1	1	1	1	1
Modeling and Simulation	0,998361039569188	0,999097635805811	0,999168744804655	0,998527245949926	1	0,99766736645673	0,998912452419793	0,998853868194842	0,998530243075184	1	0,999539170506912	0,999450247388675	0,998542162203637	1	1	1	1	0,999691358024691	1	1	0,999485861182519	1	1	1	1	1	1	0,99933569530558	1	0,997409057933465	1	0,999247271358675	1	1	1	1	1	1	1	1	1	1	1	1	1	0,999492127983748	1	0,999506172839506	1
Numerical Analysis	0,999572405929304	0,999500873471425	1	1	1	0,999680429502748	1	1	0,999590051926756	1	1	1	0,999652506298323	1	1	1	1	1	1	1	1	1	1	1	1	1	1	0,999664542099966	1	0,999754148740012	1	1	1	1	1	1	1	1	1	1	1	1	1	1	1	1	1	1	1
Statistics and Probability	0,998650306748466	0,998639191290824	0,999066583696329	0,999475707794477	0,999591670069416	0,997911445279866	0,998636053648556	1	0,999408843698274	1	0,99943661971831	0,999074645280691	0,999288425047438	1	1	1	1	1	1	1	1	1	1	1	1	1	1	0,998542982030112	1	0,99740680713128	1	1	1	1	1	1	1	0,999450549450549	0,999390243902439	1	1	1	1	1	1	1	1	1	1
Theoretical Computer Science	0,999724252033641	0,999764373232799	1	1	1	0,99955919395466	0,999873465772491	1	0,999602859412232	1	1	1	0,999489144316731	1	0,999148211243612	1	1	1	1	1	1	1	1	1	1	1	1	1	1	0,999402485659656	1	1	1	1	1	1	1	1	1	1	1	1	1	1	1	1	0,998293515358362	1	1
Medicine (all)	0,998082979597426	0,99743947858473	0,999156474061577	0,999795081967213	0,998753117206983	0,999749137660709	0,999371938198719	0,999112294718154	0,999474720945502	1	0,997849462365591	0,999583333333333	0,999830666327999	1	1	1	1	1	1	1	0,998583569405099	1	1	1	1	1	1	0,996328029375765	1	0,999406880189798	1	0,99788285109386	1	1	1	0,998236331569665	1	1	0,99748427672956	1	0,999031007751938	1	0,997045790251108	1	0,998324958123953	1	1	1	1
Medicine (miscellaneous)	0,999414862492686	0,999477533960293	1	1	1	0,999870717517776	1	1	1	1	1	1	1	1	1	1	1	1	1	1	1	1	1	1	1	1	1	0,998928571428571	1	0,999874324494156	1	0,998938428874735	1	1	1	1	1	1	1	1	1	1	1	1	1	1	1	1	1
Anatomy	0,999852311327721	0,999734113267748	1	1	1	1	1	1	1	1	1	1	1	1	1	1	1	1	1	1	1	1	1	1	1	1	1	0,999634235552304	1	1	1	1	1	1	1	1	1	1	1	1	1	1	1	1	1	1	1	1	1
Anesthesiology and Pain Medicine	1	1	1	1	1	1	1	1	1	1	1	1	1	1	1	1	1	1	1	1	1	1	1	1	1	1	1	1	1	1	1	1	1	1	1	1	1	1	1	1	1	1	1	1	1	1	1	1	1
Biochemistry (medical)	1	1	1	1	1	1	1	1	1	1	1	1	1	1	1	1	1	1	1	1	1	1	1	1	1	1	1	1	1	1	1	1	1	1	1	1	1	1	1	1	1	1	1	1	1	1	1	1	1
Cardiology and Cardiovascular Medicine	0,999852681202121	0,999735309687665	1	1	1	1	1	1	1	1	1	1	1	1	1	1	1	1	1	1	1	1	1	1	1	1	1	0,999636495819702	1	1	1	1	1	1	1	1	1	1	1	1	1	1	1	1	1	1	1	1	1
Critical Care and Intensive Care Medicine	1	1	1	1	1	1	1	1	1	1	1	1	1	1	1	1	1	1	1	1	1	1	1	1	1	1	1	1	1	1	1	1	1	1	1	1	1	1	1	1	1	1	1	1	1	1	1	1	1
Complementary and Alternative Medicine	1	1	1	1	1	1	1	1	1	1	1	1	1	1	1	1	1	1	1	1	1	1	1	1	1	1	1	1	1	1	1	1	1	1	1	1	1	1	1	1	1	1	1	1	1	1	1	1	1
Dermatology	0,999705232129698	0,999470198675497	1	1	1	1	1	1	1	1	0,997506234413965	1	1	1	1	1	1	1	1	1	1	1	1	1	1	1	1	0,999272197962154	1	1	1	1	1	1	1	1	1	1	1	1	1	1	1	1	1	1	1	1	1
Drug Guides	1	1	1	1	1	1	1	1	1	1	1	1	1	1	1	1	1	1	1	1	1	1	1	1	1	1	1	1	1	1	1	1	1	1	1	1	1	1	1	1	1	1	1	1	1	1	1	1	1
Embryology	1	0,999734042553192	1	1	1	1	1	1	1	1	1	1	1	1	1	1	1	1	1	1	1	1	1	1	1	1	1	0,999634101719722	1	1	1	1	1	1	1	1	1	1	1	1	1	1	1	1	1	1	1	1	1
Emergency Medicine	0,999853307906704	0,999737325978461	1	1	1	1	1	1	1	1	1	1	1	1	1	1	1	1	1	1	1	1	1	1	1	1	1	0,999640287769784	1	1	1	1	1	1	1	1	1	1	1	1	1	1	1	1	1	1	1	1	1
Endocrinology, Diabetes and Metabolism	0,99985289791115	0,999471877475574	1	1	0,999080036798528	1	0,999865717738687	1	1	1	1	1	1	1	1	1	1	1	1	1	1	1	1	1	1	1	1	0,999275362318841	1	1	1	1	1	1	1	1	1	1	1	1	1	1	1	1	1	1	1	1	1
Epidemiology	0,99860743629021	0,998082913970764	1	0,99957921312855	1	0,999620661313776	0,999744832865527	0,998117647058824	1	1	0,998757763975155	1	0,999743238616912	1	1	1	1	1	1	1	0,998275862068966	1	1	1	1	1	1	0,997457088366179	1	0,999397880539499	1	0,996121024049651	1	1	1	1	1	1	1	1	1	1	0,996370235934664	1	1	1	0,99616122840691	1	1
Family Practice	1	1	1	1	1	1	1	1	1	1	1	1	1	1	1	1	1	1	1	1	1	1	1	1	1	1	1	1	1	1	1	1	1	1	1	1	1	1	1	1	1	1	1	1	1	1	1	1	1
Gastroenterology	1	1	1	0,999769638332182	1	1	1	1	1	1	1	0,999462654486835	0,999911292468731	1	1	1	1	1	1	1	1	1	1	1	1	1	1	1	1	1	1	1	1	1	1	1	1	1	1	1	1	1	1	1	1	1	1	1	1
Genetics (clinical)	1	1	1	1	1	1	0,999730421889743	1	0,999858617276969	1	1	1	1	1	1	1	1	1	1	1	1	1	1	1	1	1	1	1	1	1	1	1	1	1	1	1	1	1	1	1	1	1	1	1	1	1	1	1	1
Geriatrics and Gerontology	1	1	1	1	1	0,999935069151354	1	1	1	1	1	1	1	1	1	1	1	1	1	1	1	1	1	1	1	1	1	1	1	1	1	1	1	1	1	1	1	1	1	1	1	1	1	1	1	1	1	1	1
Health Informatics	1	1	1	1	1	1	1	1	1	1	1	1	1	1	1	1	1	1	1	1	1	1	1	1	1	1	1	1	1	0,999874134675897	1	1	1	1	1	1	1	1	1	1	1	1	1	1	1	1	1	1	1
Health Policy	0,999415546464056	0,999217731421121	1	1	1	0,999935396343433	1	1	0,999860120296545	1	1	1	1	1	1	1	1	1	1	1	1	1	1	1	1	1	1	0,998574991093694	1	0,999874450721908	1	1	1	1	1	1	1	1	1	1	1	1	1	1	0,9921875	1	1	0,996845425867508	1
Hematology	1	1	1	1	1	1	1	1	1	1	1	1	1	1	1	1	1	1	1	1	1	1	1	1	1	1	1	1	1	1	1	1	1	1	1	1	1	1	1	1	1	1	1	1	1	1	1	1	1
Hepatology	1	1	1	1	1	1	1	1	1	1	1	1	1	1	1	1	1	1	1	1	1	1	1	1	1	1	1	1	1	1	1	1	1	1	1	1	1	1	1	1	1	1	1	1	1	1	1	1	1
Histology	0,999853307906704	1	1	1	1	0,99993527089132	0,999866059469596	0,999430199430199	1	1	1	0,999473961073119	0,999911606116857	1	1	1	1	1	1	1	0,995169082125604	1	1	1	1	1	1	0,999640287769784	1	0,999873976055451	1	0,998913043478261	1	1	1	1	1	0,9979035639413	0,996632996632997	1	1	1	1	1	1	1	1	1	1
Immunology and Allergy	0,999853758408891	0,999738766980146	1	1	1	1	1	1	0,999859943977591	1	0,997792494481236	1	0,999911769895888	1	1	1	1	1	1	1	1	1	1	1	1	1	1	0,99964298464834	1	1	1	1	1	1	1	1	1	0,997991967871486	1	1	1	1	1	1	1	1	0,994117647058824	1	1
Internal Medicine	1	1	1	1	1	1	1	1	1	1	1	1	1	1	1	1	1	1	1	1	1	1	1	1	1	1	1	1	1	0,999873529783736	1	1	1	1	1	1	1	1	1	1	1	1	1	1	1	1	1	1	1
Infectious Diseases	0,996783738582272	0,994540109197816	0,999649491763056	0,998879761015683	0,999040767386091	0,999451921320261	0,997983392645314	0,997434957860022	1	1	0,983453237410072	0,999652898299202	0,999755918965096	1	1	0,999115044247788	1	1	1	1	1	1	1	1	1	1	1	0,993038821954485	1	0,999551166965889	1	0,993114406779661	1	1	0,99906103286385	1	1	0,997248968363136	0,996860282574568	0,996208530805687	1	1	0,996539792387543	1	1	1	0,99911426040744	1	1
Microbiology (medical)	0,998636301650075	0,997918593894542	0,999165623696287	0,999388254486134	1	0,999373629815221	0,999123356293049	0,996921723834653	1	1	0,992639327024185	0,999175257731959	0,999577488592192	1	1	1	1	1	1	1	1	1	1	1	1	1	1	0,997270245677889	1	0,999527019037484	0,998439937597504	0,993036211699164	0,998287671232877	0,997329773030708	1	1	0,998319327731092	0,997	0,996341463414634	1	0,999054820415879	1	0,998579545454545	1	1	1	1	1	1
Nephrology	1	1	1	1	1	1	1	1	1	1	1	1	1	1	1	1	1	1	1	1	1	1	1	1	1	1	1	1	1	1	1	1	1	1	1	1	1	1	1	1	1	1	1	1	1	1	1	1	1
Neurology (clinical)	1	1	1	1	1	1	1	1	0,999858597285068	1	1	1	1	1	1	1	1	1	1	1	1	1	1	1	1	1	1	1	1	1	1	1	1	1	1	1	1	1	1	1	1	1	1	1	1	1	1	1	1
Obstetrics and Gynecology	1	1	1	1	1	1	1	1	1	1	1	1	1	1	1	1	1	1	1	1	1	1	1	1	1	1	1	1	1	1	1	1	1	1	1	1	1	1	1	1	1	1	0,992805755395683	1	0,982758620689655	1	1	1	1
Oncology	1	1	1	0,999769479022591	1	0,999935090224588	1	1	1	1	1	1	0,999911268855368	1	1	1	1	1	1	1	1	1	1	1	1	1	1	1	1	1	1	1	1	1	1	1	1	1	1	1	1	1	1	1	1	1	1	1	1
Ophthalmology	1	1	1	1	1	1	1	1	1	1	1	1	1	1	1	1	1	1	1	1	1	1	1	1	1	1	1	1	1	1	1	1	1	1	1	1	1	1	1	1	1	1	1	1	1	1	1	1	1
Orthopedics and Sports Medicine	1	1	1	1	1	0,999935086011035	1	1	1	1	1	1	1	1	1	1	1	1	1	1	1	1	1	1	1	1	1	1	1	0,999873273349385	1	1	1	1	1	1	1	1	1	1	1	1	1	1	1	1	1	1	1
Otorhinolaryngology	1	1	1	1	1	1	1	1	1	1	1	1	1	1	1	1	1	1	1	1	1	1	1	1	1	1	1	1	1	1	1	1	1	1	1	1	1	1	1	1	1	1	1	1	1	1	1	1	1
Pathology and Forensic Medicine	1	1	1	1	1	1	1	1	1	1	0,99749373433584	1	1	1	1	1	1	1	1	1	0,994252873563218	1	1	1	1	1	1	0,999635966508919	1	1	1	1	1	1	1	1	1	0,99548532731377	1	1	1	1	1	1	1	1	1	1	1
Pediatrics, Perinatology and Child Health	1	1	1	1	1	1	1	1	1	1	1	1	1	1	1	1	1	1	1	1	1	1	1	1	1	1	1	1	1	1	1	1	1	1	1	1	1	1	1	1	1	1	0,993670886075949	1	0,987012987012987	1	1	1	1
Pharmacology (medical)	0,999852702901753	0,999735379730087	1	1	1	0,999935153362298	0,999865555256789	1	1	1	1	1	1	1	1	1	1	1	1	1	1	1	1	1	1	1	1	0,999272991639404	1	1	1	1	1	1	1	1	1	1	1	1	1	1	1	1	1	1	1	1	1
Physiology (medical)	0,999718864211414	0,999512670565302	1	1	1	0,999364595247172	0,999871200412159	1	0,999730312837109	1	1	1	0,999913874773921	1	0,999033816425121	1	1	1	1	1	1	1	1	1	1	1	1	0,999350016249594	1	0,99866228870242	1	1	1	1	1	1	1	1	0,998319327731092	1	1	1	1	1	1	1	1	1	1
Psychiatry and Mental Health	1	1	1	1	1	0,999935258319306	1	1	0,999859471613266	1	1	1	0,999911582670203	1	1	1	1	1	1	1	1	1	1	1	1	1	1	1	1	1	1	1	1	1	1	1	1	1	1	1	1	1	1	1	0,989473684210526	1	1	1	1
Public Health, Environmental and Occupational Health	0,993916928048665	0,996555835209962	0,999467896417169	0,998402163225172	0,998355939169749	0,995347135089921	0,998305840392332	0,997640653357532	0,99612724757953	1	0,998091603053435	0,999647079583554	0,996406468356957	0,999743983614951	0,999555851654453	1	1	1	1	1	0,998992697053639	1	1	1	1	1	1	0,994934765924789	1	0,995795435043762	0,999742467164563	0,997219251336898	1	0,999498872463042	0,999480654375487	0,99973924380704	0,999739379723742	0,999056826220231	0,999015020930805	0,999479708636837	0,999767441860465	1	0,999239350912779	0,999740663900415	0,999482401656315	0,999749874937469	1	0,999506538366642	1
Pulmonary and Respiratory Medicine	0,999852767962309	0,999735589635114	1	1	0,999074930619796	1	1	1	1	1	0,997542997542998	1	1	1	1	1	1	1	1	1	1	1	1	1	1	1	1	0,999637023593466	1	1	1	1	1	1	1	1	1	1	1	1	0,998031496062992	1	1	1	1	1	1	1	1
Radiology, Nuclear Medicine and Imaging	0,999854397204426	0,999740798341109	1	1	1	1	1	1	0,999860529986053	1	1	1	0,99991200281591	1	1	1	1	1	1	1	1	1	1	1	1	1	1	0,999646767926528	1	1	1	1	1	1	1	1	1	1	1	1	1	1	1	1	1	1	1	1	1
Rehabilitation	1	1	1	1	1	1	1	1	1	1	1	1	1	1	1	1	1	1	1	1	1	1	1	1	1	1	1	1	1	1	1	1	1	1	1	1	1	1	1	1	1	1	1	1	1	1	1	1	1
Reproductive Medicine	1	1	1	1	1	1	1	1	1	1	1	1	1	1	1	1	1	1	1	1	1	1	1	1	1	1	1	1	1	1	1	1	1	1	1	1	1	1	1	1	1	1	1	1	1	1	1	1	1
Rheumatology	1	1	1	1	1	1	1	1	1	1	1	1	1	1	1	1	1	1	1	1	1	1	1	1	1	1	1	1	1	1	1	1	1	1	1	1	1	1	1	1	1	1	1	1	1	1	1	1	1
Surgery	0,999852311327721	0,999734113267748	1	1	1	1	1	1	1	1	1	1	1	1	1	1	1	1	1	1	1	1	1	1	1	1	1	0,999634235552304	1	1	1	1	1	1	1	1	1	1	1	1	1	1	1	1	1	1	1	1	1
Transplantation	1	1	1	1	1	1	1	1	1	1	1	1	1	1	1	1	1	1	1	1	1	1	1	1	1	1	1	1	1	1	1	1	1	1	1	1	1	1	1	1	1	1	1	1	1	1	1	1	1
Urology	1	1	1	1	1	1	1	1	1	1	1	1	1	1	1	1	1	1	1	1	1	1	1	1	1	1	1	1	1	1	1	1	1	1	1	1	1	1	1	1	1	1	1	1	1	1	1	1	1
Neuroscience (all)	0,998851729582317	1	1	0,999559180074939	0,999208234362629	0,999487146611962	0,999212391703859	0,999476987447699	0,999725085910653	1	0,99830220713073	0,999514091350826	0,999738402511336	1	1	1	1	0,999397227245329	1	1	0,988919667590028	1	1	1	1	1	1	0,998636673483299	1	0,999381800197824	1	1	1	0,99738219895288	1	1	1	1	1	1	0,998550724637681	1	1	1	1	1	1	1	1
Neuroscience (miscellaneous)	1	1	1	1	1	1	1	1	0,999858577287512	1	1	1	1	1	1	1	1	1	1	1	1	1	1	1	1	1	1	1	1	1	1	1	1	1	1	1	1	1	1	1	1	1	1	1	1	1	1	1	1
Behavioral Neuroscience	1	1	1	1	0,999058380414313	0,999935086011035	0,999730494542515	1	1	1	1	1	1	1	1	1	1	1	1	1	1	1	1	1	1	1	1	1	1	1	1	1	1	1	1	1	1	1	1	1	1	1	1	1	1	1	1	1	1
Biological Psychiatry	1	1	1	1	1	1	1	1	1	1	1	1	1	1	1	1	1	1	1	1	1	1	1	1	1	1	1	1	1	1	1	1	1	1	1	1	1	1	1	1	1	1	1	1	1	1	1	1	1
Cellular and Molecular Neuroscience	0,999704622655442	1	1	1	1	1	0,999865247271257	1	1	1	1	1	1	1	1	1	1	1	1	1	1	1	1	1	1	1	1	1	1	1	1	0,998857142857143	1	1	1	1	1	1	1	1	1	1	1	1	1	1	1	1	1
Cognitive Neuroscience	1	1	1	0,999777183600713	1	0,999678497942387	1	1	1	1	1	1	0,999912434325744	1	1	1	1	1	1	1	1	1	1	1	1	1	1	1	1	0,999253452780888	1	1	1	1	1	1	1	1	1	1	1	1	1	1	1	1	1	1	1
Developmental Neuroscience	1	1	1	1	1	1	1	1	1	1	1	1	1	1	1	1	1	1	1	1	1	1	1	1	1	1	1	1	1	1	1	1	1	1	1	1	1	1	1	1	1	1	1	1	1	1	1	1	1
Endocrine and Autonomic Systems	1	1	1	1	1	1	1	1	1	1	1	1	1	1	1	1	1	1	1	1	1	1	1	1	1	1	1	1	1	1	1	1	1	1	1	1	1	1	1	1	1	1	1	1	1	1	1	1	1
Neurology	1	1	1	1	1	1	1	1	1	1	1	1	1	1	1	1	1	1	1	1	1	1	1	1	1	1	1	1	1	1	1	1	1	1	1	1	1	1	1	1	1	1	1	1	1	1	1	1	1
Sensory Systems	0,999852224028373	1	1	1	1	1	1	1	1	1	1	1	1	1	1	1	1	1	1	1	1	1	1	1	1	1	1	1	1	1	1	1	1	1	1	1	1	1	1	1	1	1	1	1	1	1	1	1	1
Nursing (all)	1	1	1	1	1	1	1	1	1	1	1	1	1	1	1	1	1	1	1	1	1	1	1	1	1	1	1	1	1	1	1	1	1	1	1	1	1	1	1	1	1	1	1	1	1	1	1	1	1
Nursing (miscellaneous)	1	1	1	1	1	1	1	1	1	1	1	1	1	1	1	1	1	1	1	1	1	1	1	1	1	1	1	1	1	1	1	1	1	1	1	1	1	1	1	1	1	1	1	1	1	1	1	1	1
Advanced and Specialized Nursing	0,999852267690944	0,999733971801011	1	1	1	1	1	1	1	1	1	1	1	1	1	1	1	1	1	1	1	1	1	1	1	1	1	0,999633967789165	1	1	1	1	1	1	1	1	1	1	1	1	1	1	1	1	1	1	1	1	1
Assessment and Diagnosis	1	1	1	1	1	1	1	1	1	1	1	1	1	1	1	1	1	1	1	1	1	1	1	1	1	1	1	1	1	1	1	1	1	1	1	1	1	1	1	1	1	1	1	1	1	1	1	1	1
Community and Home Care	1	0,999734607218684	1	1	1	0,999935107073329	1	1	1	1	1	1	1	1	1	1	1	1	1	1	1	1	1	1	1	1	1	1	1	1	1	0,998864926220204	1	1	1	1	1	1	1	1	1	1	1	1	1	1	1	1	1
Emergency Nursing	0,999853027630805	0,999736425935688	1	1	1	1	1	1	1	1	1	1	1	1	1	1	1	1	1	1	1	1	1	1	1	1	1	0,999638597759306	1	1	1	1	1	1	1	1	1	1	1	1	1	1	1	1	1	1	1	1	1
Gerontology	1	1	1	1	1	1	1	1	1	1	1	1	1	1	1	1	1	1	1	1	1	1	1	1	1	1	1	1	1	1	1	1	1	1	1	1	1	1	1	1	1	1	1	1	1	1	1	1	1
Issues, Ethics and Legal Aspects	1	1	1	1	1	1	1	1	1	1	1	1	1	1	1	1	1	1	1	1	1	1	1	1	1	1	1	1	1	1	1	1	1	1	1	1	1	1	1	1	1	1	1	1	1	1	1	1	1
Leadership and Management	1	1	1	1	1	1	1	1	1	1	1	1	1	1	1	1	1	1	1	1	1	1	1	1	1	1	1	1	1	1	1	1	1	1	1	1	1	1	1	1	1	1	1	1	1	1	1	1	1
LPN and LVN	1	1	1	1	1	1	1	1	1	1	1	1	1	1	1	1	1	1	1	1	1	1	1	1	1	1	1	1	1	1	1	1	1	1	1	1	1	1	1	1	1	1	1	1	1	1	1	1	1
Maternity and Midwifery	1	1	1	1	1	1	1	1	1	1	1	1	1	1	1	1	1	1	1	1	1	1	1	1	1	1	1	1	1	1	1	1	1	1	1	1	1	1	1	1	1	1	1	1	1	1	1	1	1
Medical and Surgical Nursing	1	1	1	1	1	1	1	1	1	1	1	1	1	1	1	1	1	1	1	1	1	1	1	1	1	1	1	1	1	1	1	1	1	1	1	1	1	1	1	1	1	1	1	1	1	1	1	1	1
Nutrition and Dietetics	1	1	1	1	1	0,999935170178282	1	1	1	1	1	1	1	1	1	1	1	1	1	1	1	1	1	1	1	1	1	1	1	1	1	0,998883928571429	1	1	1	1	1	1	1	1	1	1	1	1	1	1	1	1	1
Oncology (nursing)	1	1	1	1	1	1	1	1	1	1	1	1	1	1	1	1	1	1	1	1	1	1	1	1	1	1	1	1	1	1	1	1	1	1	1	1	1	1	1	1	1	1	1	1	1	1	1	1	1
Pediatrics	1	1	1	1	1	1	1	1	1	1	1	1	1	1	1	1	1	1	1	1	1	1	1	1	1	1	1	1	1	1	1	1	1	1	1	1	1	1	1	1	1	1	1	1	1	1	1	1	1
Pharmacology (nursing)	1	1	1	1	1	1	1	1	1	1	1	1	1	1	1	1	1	1	1	1	1	1	1	1	1	1	1	1	1	1	1	1	1	1	1	1	1	1	1	1	1	1	1	1	1	1	1	1	1
Psychiatric Mental Health	1	1	1	1	1	1	1	1	1	1	1	1	1	1	1	1	1	1	1	1	1	1	1	1	1	1	1	1	1	1	1	1	1	1	1	1	1	1	1	1	1	1	1	1	1	1	1	1	1
Pharmacology, Toxicology and Pharmaceutics (all)	0,999853070819865	0,999472990777339	1	1	1	1	0,999865861837693	1	1	1	1	1	0,999911520084941	1	1	1	1	1	1	1	1	1	1	1	1	1	1	0,999638858793788	1	1	1	1	1	1	1	1	1	1	1	1	1	1	1	1	1	1	1	1	1
Pharmacology, Toxicology and Pharmaceutics (miscellaneous)	1	1	1	1	1	1	1	1	1	1	1	1	1	1	1	1	1	1	1	1	1	1	1	1	1	1	1	1	1	1	1	1	1	1	1	1	1	1	1	1	1	1	1	1	1	1	1	1	1
Drug Discovery	1	1	1	1	1	1	0,9997308934338	1	1	1	1	1	1	1	1	1	1	1	1	1	1	1	1	1	1	1	1	1	1	1	1	1	1	1	1	1	1	1	1	1	1	1	1	1	1	1	1	1	1
Pharmaceutical Science	1	1	1	1	1	0,999870273075177	0,999865501008742	1	1	1	1	1	1	1	1	1	1	1	1	1	1	1	1	1	1	1	1	1	1	0,999746931544983	1	1	1	1	1	1	1	1	1	1	1	1	1	1	1	1	1	1	1
Pharmacology	0,999853221781888	1	1	1	0,999092558983666	0,999805737227223	0,999597855227882	0,999428897772701	1	1	1	1	1	1	1	1	1	1	1	1	1	1	1	1	1	1	1	1	1	1	1	1	1	1	1	1	1	1	1	1	1	1	1	1	1	1	1	1	1
Toxicology	0,998571768626518	0,998331788693234	0,999423298731257	0,998492209750377	0,997403560830861	0,998001410768869	0,99845286772019	0,998506124887959	0,999081304547543	0,99949083503055	0,999506903353057	0,998568565702834	0,998759112765627	1	1	1	1	1	1	1	1	1	1	1	1	1	1	0,99793956043956	1	0,998529102752679	1	0,998009554140127	1	1	1	1	1	0,999517607332368	1	1	0,998589562764457	1	1	1	1	1	1	1	1
Physics and Astronomy (all)	0,996187753157017	0,998335491030146	0,999425287356322	0,999498914314348	1	0,997413894439873	0,998123206005741	0,999702646446625	0,997703261368856	1	0,999509803921569	0,999144568006843	0,997906165180302	0,999427590154551	1	0,999431171786121	1	0,998390212491951	1	1	0,999449035812672	1	1	1	1	1	1	0,996111619396157	1	0,997584287364773	0,999419953596288	0,999604430379747	1	1	1	1	1	1	1	1	0,999532928538066	1	1	1	1	1	1	0,999472295514512	1
Physics and Astronomy (miscellaneous)	0,999712395743457	1	1	1	1	0,999679137521658	1	1	0,999586492074431	1	1	1	0,999650593990217	0,996389891696751	1	1	1	1	1	1	1	1	1	1	1	1	1	0,999657299520219	1	0,999752229930624	1	1	1	1	1	1	1	1	1	1	1	1	1	1	1	1	1	1	1
Acoustics and Ultrasonics	1	1	1	1	1	0,999935203784099	0,999865771812081	1	1	1	1	1	1	1	1	1	1	1	1	1	1	1	1	1	1	1	1	1	1	1	1	1	1	1	1	1	1	1	1	1	1	1	1	1	1	1	1	1	1
Astronomy and Astrophysics	0,999281092739037	0,999746771334515	1	1	1	0,99980755661043	0,999605574546411	1	1	1	1	1	0,99973805989697	1	1	1	1	1	1	1	1	1	1	1	1	1	1	0,999657768651608	1	0,999752352649827	1	1	1	1	1	1	1	1	1	1	1	1	1	1	1	1	1	1	1
Condensed Matter Physics	0,999098635075972	0,998949138293401	0,99964639321075	0,999437570303712	1	0,998657144601111	0,999168152109329	1	0,999256413434131	1	1	0,999299474605954	0,998448979591837	1	1	1	1	0,999592999593	1	1	1	1	1	1	1	1	1	0,999196356817573	1	0,998648496452303	1	0,998398291510945	1	1	1	1	1	1	1	1	1	1	1	1	1	1	1	1	1
Instrumentation	0,999332710529828	0,99933110367893	1	0,999209173586398	1	0,999255490755677	0,998647984267453	1	0,999743523980508	1	1	1	0,999165554072096	1	0,998587570621469	1	1	0,997704315886134	1	1	1	1	1	1	1	1	1	0,999421798207574	1	0,998721673445671	1	1	1	1	1	1	1	1	1	1	1	1	1	1	1	1	1	0,998965873836608	1
Nuclear and High Energy Physics	0,999854376001165	1	1	1	1	0,999870951090463	0,999467589511513	1	0,999860510531455	1	1	1	0,99982397465235	1	0,997455470737914	1	1	0,999355670103093	1	1	1	1	1	1	1	1	1	1	1	0,999874765184721	1	1	1	1	1	1	1	1	1	1	1	1	1	1	1	1	1	1	1
Atomic and Molecular Physics, and Optics	0,999311199889792	0,999058823529412	1	0,999378238341969	1	0,999055475096027	0,999367728882145	1	0,999603332011107	1	1	1	0,999489535477284	1	1	1	1	0,998458376156218	1	1	1	1	1	1	1	1	1	0,99937984496124	1	0,998925116445718	1	0,999267935578331	1	1	1	1	1	1	1	1	1	1	1	1	1	1	1	0,998635743519782	1
Radiation	1	1	1	1	1	0,999935475545232	0,999067785324278	1	1	1	1	1	0,999823959158525	1	1	1	1	0,996767937944409	1	1	1	1	1	1	1	1	1	1	1	1	1	1	1	1	1	1	1	1	1	1	1	1	1	1	1	1	1	1	1
Statistical and Nonlinear Physics	1	1	1	1	1	0,99967880773431	0,999868212967844	1	0,999585578118525	1	1	1	0,999737601679349	1	1	1	1	1	1	1	1	1	1	1	1	1	1	1	1	0,999751737835154	1	1	1	1	1	1	1	1	1	1	1	1	1	1	1	1	1	1	1
Surfaces and Interfaces	0,999858397054659	1	1	0,99978383052313	1	1	1	1	1	1	1	1	0,999740394600208	1	1	1	1	1	1	1	1	1	1	1	1	1	1	1	1	0,999877750611247	1	0,998281786941581	1	1	1	1	1	1	1	1	1	1	1	1	1	1	1	1	1
Psychology (all)	1	1	1	1	1	0,999805825242718	1	1	1	1	1	1	1	1	1	1	1	1	1	1	1	1	1	1	1	1	1	1	1	0,999748015623031	1	1	1	1	1	1	1	1	1	1	1	1	1	1	1	1	1	1	1
Psychology (miscellaneous)	1	1	1	1	1	1	1	1	1	1	1	1	1	1	1	1	1	1	1	1	1	1	1	1	1	1	1	1	1	1	1	1	1	1	1	1	1	1	1	1	1	1	1	1	1	1	1	1	1
Applied Psychology	1	1	0,99948051948052	0,999774419129258	1	0,99993548803303	1	0,999446596568899	1	1	1	1	0,999912010558733	1	1	1	1	1	1	1	1	1	1	1	1	1	1	1	1	1	1	1	1	1	1	1	1	1	1	1	1	1	1	1	1	1	1	0,997050147492625	1
Clinical Psychology	1	1	1	1	1	1	1	1	1	1	1	1	1	1	1	1	1	1	1	1	1	1	1	1	1	1	1	1	1	1	1	1	1	1	1	1	1	1	1	1	1	1	1	1	1	1	1	1	1
Developmental and Educational Psychology	1	1	1	1	1	1	1	1	1	1	1	1	1	1	1	1	1	1	1	1	1	1	1	1	1	1	1	1	1	1	1	1	1	1	1	1	1	1	1	1	1	1	1	1	1	1	1	1	1
Experimental and Cognitive Psychology	1	0,999734958918632	1	1	1	1	1	1	1	1	1	1	1	1	1	1	1	1	1	1	1	1	1	1	1	1	1	0,999635833940277	1	1	1	1	1	1	1	1	1	1	1	1	1	1	1	1	1	1	1	1	1
Neuropsychology and Physiological Psychology	1	1	1	1	1	1	1	1	1	1	1	1	1	1	1	1	1	1	1	1	1	1	1	1	1	1	1	1	1	1	1	1	1	1	1	1	1	1	1	1	1	1	1	1	1	1	1	1	1
Social Psychology	1	1	1	0,999771167048055	1	1	1	1	1	1	1	1	0,999911520084941	1	1	1	1	1	1	1	1	1	1	1	1	1	1	1	1	1	1	1	1	1	1	1	1	1	1	1	1	1	1	1	1	1	1	1	1
Social Sciences (all)	0,997788186312776	0,99914693964598	1	0,999239977199316	0,998994974874372	0,998774134232302	0,999520843315764	0,999621212121212	0,998999624859322	1	1	0,999281867145422	0,999261689909762	1	0,999383477188656	0,999033816425121	1	1	1	1	0,997247706422018	1	1	1	1	1	1	0,998907700709995	1	0,998637756839596	1	1	1	1	1	1	1	0,998530492285085	1	1	1	1	0,997175141242938	1	0,998982706002035	1	1	1	1
Social Sciences (miscellaneous)	0,997570332480818	0,999378367177787	0,999654457498272	0,999259122059641	0,999529854254819	0,997748570037727	0,998702371121859	0,999279279279279	0,998400590551181	1	1	0,999315302978432	0,998782467532468	1	0,998861696072851	1	1	0,99880999603332	1	1	0,999185667752443	1	1	1	1	1	1	0,996569015571391	1	0,997986351940933	1	1	1	1	1	1	1	1	1	1	0,999356499356499	1	1	1	0,999106344950849	1	1	1	1
Archeology	0,99416761759858	0,998168498168498	0,999665327978581	0,999636032757052	0,9995497523638	0,99812507560179	0,991183731045022	0,999651567944251	0,99890590809628	1	1	0,998007306542677	0,998872331856625	0,999202551834131	0,984657534246575	0,997624703087886	1	0,973735789886319	1	1	0,999243570347958	1	0,999151103565365	1	1	1	1	0,997684589657834	1	0,999336650082919	1	1	1	1	1	1	1	0,999371859296482	1	1	0,998177399756987	1	1	1	1	1	1	0,999286733238231	1
Development	0,998868636077938	0,998989694887856	0,999005634736493	0,997279158352984	0,999111505997335	0,998853833624902	0,999070307960488	0,998965160400138	0,998546159437848	0,999339498018494	1	0,999343401181878	0,997425168973286	1	0,997872340425532	0,999228395061728	1	0,998866213151927	1	1	1	1	1	1	1	1	1	0,999490445859873	1	0,99823516435032	1	1	1	0,99927060539752	1	1	1	0,999383857054837	1	1	0,999404407385348	1	1	1	1	0,999273783587509	1	0,999302163293789	1
Education	0,999856754046698	1	1	0,9997799779978	1	0,999551483308772	0,999868938401049	1	0,999725350178522	1	1	1	0,999738562091503	1	0,99889012208657	1	1	1	1	1	1	1	1	1	1	1	1	1	1	0,999629492404594	1	1	1	1	1	1	1	1	1	1	1	1	1	1	1	1	1	1	1
Geography, Planning and Development	0,992420394608322	0,996121810409413	0,997113302862641	0,994098897312198	0,999002891614318	0,983191539643153	0,99394954145896	0,997242380261248	0,991496269954776	0,999586178357128	0,99979381443299	0,998800844205679	0,988780927576881	0,999685946087412	0,999035043169121	0,99989539748954	1	0,998777446329894	1	1	0,999791395045632	1	1	1	0,99989496901586	1	1	0,997280228645185	1	0,98356754306437	1	0,99989944695827	1	0,999895806199531	1	1	1	0,999742851265172	0,999844285269387	0,999947503805974	0,99974358974359	1	0,999738848845712	0,999842585790744	0,999895112229914	0,999687451164244	0,999895392018411	0,999740313701049	0,999947492780257
Health (social science)	0,999428653049564	0,999248496993988	1	1	1	0,999808110528336	1	1	0,999863126197646	1	1	1	0,999826071832333	1	0,998917748917749	1	1	1	1	1	1	1	1	1	1	1	1	0,998312521093486	1	0,999876877616351	1	1	1	1	1	1	1	1	1	1	1	1	0,997267759562842	0,996376811594203	1	1	0,994029850746269	1	1
Human Factors and Ergonomics	1	1	1	1	1	1	1	1	1	1	1	1	1	1	1	1	1	1	1	1	1	1	1	1	1	1	1	1	1	1	1	1	1	1	1	1	1	1	1	1	1	1	1	0,988636363636364	1	1	1	1	1
Law	0,999855637361051	1	1	1	1	0,999871448772336	1	1	1	1	1	1	1	1	1	1	1	1	1	1	1	1	1	1	1	1	1	1	1	0,999751367478866	1	1	1	1	1	1	1	1	1	1	1	1	1	1	1	0,997067448680352	1	0,997481108312343	1
Library and Information Sciences	0,999857873791927	1	1	1	1	0,999361389616195	0,999869876382563	1	0,999727409022761	1	1	1	0,999566273421235	1	1	1	1	1	1	1	1	1	1	1	1	1	1	1	1	0,99926371333906	1	1	1	1	1	1	1	1	1	1	1	1	1	1	1	0,997777777777778	1	0,99802371541502	1
Linguistics and Language	1	1	1	1	1	1	1	1	1	1	1	1	1	1	1	1	1	1	1	1	1	1	1	1	1	1	1	1	1	1	1	1	1	1	1	1	1	1	1	1	1	1	1	1	1	1	1	1	1
Safety Research	0,999577047793599	0,99951028403526	1	0,999570631172177	1	0,999681994530306	0,99961250322914	1	0,999594320486815	1	1	1	0,999654815326199	1	1	1	1	1	1	1	1	1	1	1	1	1	1	0,99901832460733	1	0,999390912413205	1	1	1	1	1	1	1	1	1	1	1	1	1	1	1	1	1	1	1
Sociology and Political Science	0,9993132811427	0,998829313977991	1	0,998761354252684	0,99872854418309	0,999371385466432	0,999495649981087	0,999550157444894	0,999472573839662	1	0,998888888888889	0,999577880962431	0,999830220713073	0,996699669966997	0,997506234413965	1	1	0,999492385786802	1	1	1	1	1	1	1	1	1	0,999075785582255	1	0,999285544177185	1	1	1	1	1	1	1	1	1	1	1	1	0,998454404945904	1	0,998233215547703	0,998569384835479	1	0,998675496688742	1
Transportation	0,999450473966204	0,999765917602996	0,999572284003422	1	1	0,999559969826502	0,99949545913219	0,99954954954955	0,999868143459916	1	1	1	0,999745244565217	1	1	1	1	1	1	1	0,997019374068554	1	1	1	1	1	1	0,999383477188656	1	0,999166071003097	1	1	1	1	1	1	1	1	1	1	1	1	1	1	1	0,998563218390805	1	0,998670212765957	1
Anthropology	0,999564333430148	0,998967741935484	1	0,999775381850854	0,999150382327952	0,999871125716863	0,999336253816541	0,999452354874042	0,999860917941585	1	1	0,999492900608519	0,999912157413914	0,995238095238095	0,996277915632754	1	1	0,998727735368957	1	1	1	1	1	1	1	1	1	0,998946998946999	1	0,99987509367974	1	1	1	1	1	1	1	1	1	1	1	1	1	1	1	1	1	0,997206703910615	1
Communication	1	1	1	1	1	0,999935354580128	1	1	0,999859924359154	1	1	1	0,99991176211065	1	1	1	1	1	1	1	1	1	1	1	1	1	1	1	1	1	1	1	1	1	1	1	1	1	1	1	1	1	1	1	1	0,99601593625498	1	0,996742671009772	0,98936170212766
Cultural Studies	0,999708836803028	0,999481731018399	1	1	1	0,999741918833473	0,999733971801011	1	0,999860568878974	1	0,997938144329897	1	0,999912018300194	1	0,99873417721519	1	1	0,99935691318328	1	1	1	1	1	1	1	1	1	0,998940303779583	1	0,999749593088769	1	1	1	1	1	1	1	1	1	1	1	1	1	1	1	1	1	1	1
Demography	0,999706055261611	0,999736495388669	1	1	1	1	1	1	1	1	1	1	1	0,992125984251969	1	1	1	1	1	1	1	1	1	1	1	1	1	0,999638728323699	1	1	1	1	1	1	1	1	1	1	1	1	1	1	1	1	0,988372093023256	1	1	1	1
Gender Studies	1	1	1	1	1	1	1	1	1	1	0,997402597402597	1	1	1	1	1	1	1	1	1	1	1	1	1	1	1	1	1	1	1	1	1	1	1	1	1	1	1	1	1	1	1	1	1	1	1	1	1	1
Life-span and Life-course Studies	1	1	1	1	1	1	1	1	1	1	1	1	1	1	1	1	1	1	1	1	1	1	1	1	1	1	1	1	1	1	1	1	1	1	1	1	1	1	1	1	1	1	1	1	1	1	1	1	1
Political Science and International Relations	0,999706873809175	0,999737808075511	1	1	1	1	1	0,999432463110102	1	1	1	0,999475890985325	1	1	0,998655913978495	1	1	1	1	1	1	1	1	1	1	1	1	0,999641191245066	1	1	1	1	1	1	1	1	1	1	1	1	0,998148148148148	1	1	1	1	1	1	1	1
Public Administration	1	1	1	1	1	1	1	1	1	1	1	1	1	1	1	1	1	1	1	1	1	1	1	1	1	1	1	1	1	1	1	1	1	1	1	1	1	1	1	1	1	1	1	1	1	0,995689655172414	1	1	1
Urban Studies	0,999358151476252	0,998744507219083	0,999297999297999	1	0,99951992318771	0,998292578815781	0,998933017190279	1	0,999505745706166	1	1	1	0,999674452673557	0,99910394265233	0,998832457676591	0,999112688553682	1	0,99959661153691	1	1	1	1	1	1	1	1	1	0,998400852878465	1	0,997751040143933	1	1	1	1	1	1	1	1	1	1	1	1	1	0,99906191369606	1	0,9983429991715	1	0,999208860759494	1
Veterinary (all)	0,998997709049255	0,998490566037736	1	0,998681028797538	0,996078431372549	0,999743901658237	0,998426848453068	0,99948132780083	0,99972568920587	1	0,97979797979798	0,999517839922854	0,999912937489117	1	1	1	1	1	1	1	1	1	1	1	1	1	1	0,997964721845319	1	0,999753299617614	1	1	1	1	1	1	0,995884773662551	0,998461538461539	0,997872340425532	1	0,998583569405099	1	1	1	1	1	1	1	1
Veterinary (miscellaneous)	1	0,999736911339121	1	0,999771428571429	1	1	0,999865951742627	1	1	1	0,992924528301887	1	1	1	1	1	1	1	1	1	1	1	1	1	1	1	1	0,999278759466282	1	1	1	1	1	1	1	1	1	1	1	1	1	1	1	1	1	1	1	1	1
Equine	1	1	1	1	1	1	1	1	1	1	1	1	1	1	1	1	1	1	1	1	1	1	1	1	1	1	1	1	1	1	1	1	1	1	1	1	1	1	1	1	1	1	1	1	1	1	1	1	1
Food Animals	1	1	1	1	1	1	1	1	1	1	1	1	1	1	1	1	1	1	1	1	1	1	1	1	1	1	1	1	1	1	1	1	1	1	1	1	1	1	1	1	1	1	1	1	1	1	1	1	1
Small Animals	1	1	1	1	1	1	1	1	1	1	1	1	1	1	1	1	1	1	1	1	1	1	1	1	1	1	1	1	1	1	1	1	1	1	1	1	1	1	1	1	1	1	1	1	1	1	1	1	1
Dentistry (all)	1	1	1	1	1	1	1	1	1	1	1	1	1	1	1	1	1	1	1	1	1	1	1	1	1	1	1	1	1	1	1	1	1	1	1	1	1	1	1	1	1	1	1	1	1	1	1	1	1
Dentistry (miscellaneous)	1	1	1	1	1	1	1	1	1	1	1	1	1	1	1	1	1	1	1	1	1	1	1	1	1	1	1	1	1	1	1	1	1	1	1	1	1	1	1	1	1	1	1	1	1	1	1	1	1
Oral Surgery	1	1	1	1	1	1	1	1	1	1	1	1	1	1	1	1	1	1	1	1	1	1	1	1	1	1	1	1	1	1	1	1	1	1	1	1	1	1	1	1	1	1	1	1	1	1	1	1	1
Orthodontics	1	1	1	1	1	1	1	1	1	1	1	1	1	1	1	1	1	1	1	1	1	1	1	1	1	1	1	1	1	1	1	1	1	1	1	1	1	1	1	1	1	1	1	1	1	1	1	1	1
Periodontics	1	1	1	1	1	1	1	1	1	1	1	1	1	1	1	1	1	1	1	1	1	1	1	1	1	1	1	1	1	1	1	1	1	1	1	1	1	1	1	1	1	1	1	1	1	1	1	1	1
Health Professions (all)	1	1	1	1	1	1	1	1	1	1	1	1	1	1	1	1	1	1	1	1	1	1	1	1	1	1	1	1	1	1	1	1	1	1	1	1	1	1	1	1	1	1	1	1	1	1	1	1	1
Health Professions (miscellaneous)	1	1	1	1	1	1	1	1	1	1	1	1	1	1	1	1	1	1	1	1	1	1	1	1	1	1	1	1	1	1	1	1	1	1	1	1	1	1	1	1	1	1	1	1	1	1	1	1	1
Chiropractics	1	1	1	1	1	1	1	1	1	1	1	1	1	1	1	1	1	1	1	1	1	1	1	1	1	1	1	1	1	1	1	1	1	1	1	1	1	1	1	1	1	1	1	1	1	1	1	1	1
Complementary and Manual Therapy	1	1	1	1	1	1	1	1	1	1	1	1	1	1	1	1	1	1	1	1	1	1	1	1	1	1	1	1	1	1	1	1	1	1	1	1	1	1	1	1	1	1	1	1	1	1	1	1	1
Emergency Medical Services	1	1	1	1	1	1	1	1	1	1	1	1	1	1	1	1	1	1	1	1	1	1	1	1	1	1	1	1	1	1	1	1	1	1	1	1	1	1	1	1	1	1	1	1	1	1	1	1	1
Health Information Management	0,999853049228508	0,999736495388669	1	1	1	0,999935220573946	1	1	1	1	1	1	1	1	1	1	1	1	1	1	1	1	1	1	1	1	1	0,999638728323699	1	0,999747538500379	1	1	1	1	1	1	1	1	1	1	1	1	1	1	1	1	0,985294117647059	1	1
Medical Laboratory Technology	1	1	1	1	1	1	1	1	1	1	1	1	1	1	1	1	1	1	1	1	1	1	1	1	1	1	1	1	1	1	1	1	1	1	1	1	1	1	1	1	1	1	1	1	1	1	1	1	1
Occupational Therapy	1	1	1	1	1	1	1	1	1	1	1	1	1	1	1	1	1	1	1	1	1	1	1	1	1	1	1	1	1	1	1	1	1	1	1	1	1	1	1	1	1	1	1	1	1	1	1	1	1
Optometry	1	1	1	1	1	1	1	1	1	1	1	1	1	1	1	1	1	1	1	1	1	1	1	1	1	1	1	1	1	1	1	1	1	1	1	1	1	1	1	1	1	1	1	1	1	1	1	1	1
Pharmacy	1	1	1	1	1	1	1	1	1	1	1	1	1	1	1	1	1	1	1	1	1	1	1	1	1	1	1	1	1	1	1	1	1	1	1	1	1	1	1	1	1	1	1	1	1	1	1	1	1
Physical Therapy, Sports Therapy and Rehabilitation	1	1	1	1	1	0,999935090224588	1	1	1	1	1	1	1	1	1	1	1	1	1	1	1	1	1	1	1	1	1	1	1	0,999873289406994	1	1	1	1	1	1	1	1	1	1	1	1	1	1	1	1	1	1	1
Radiological and Ultrasound Technology	1	1	1	1	1	1	1	1	1	1	1	1	1	1	1	1	1	1	1	1	1	1	1	1	1	1	1	1	1	1	1	1	1	1	1	1	1	1	1	1	1	1	1	1	1	1	1	1	1
Speech and Hearing	1	1	1	1	1	1	1	1	1	1	1	1	1	1	1	1	1	1	1	1	1	1	1	1	1	1	1	1	1	1	1	1	1	1	1	1	1	1	1	1	1	1	1	1	1	1	1	1	1
[truncated: 270 more columns]
