# Supplementary figures and images for: The Premise of Interdisciplinarity and Its Actual Absence—A Bibliometric Analysis of Publications on Heavy Rainfall
Source: MDPI journal article supplement (doi:10.3390/w14193001), 2022-09-23

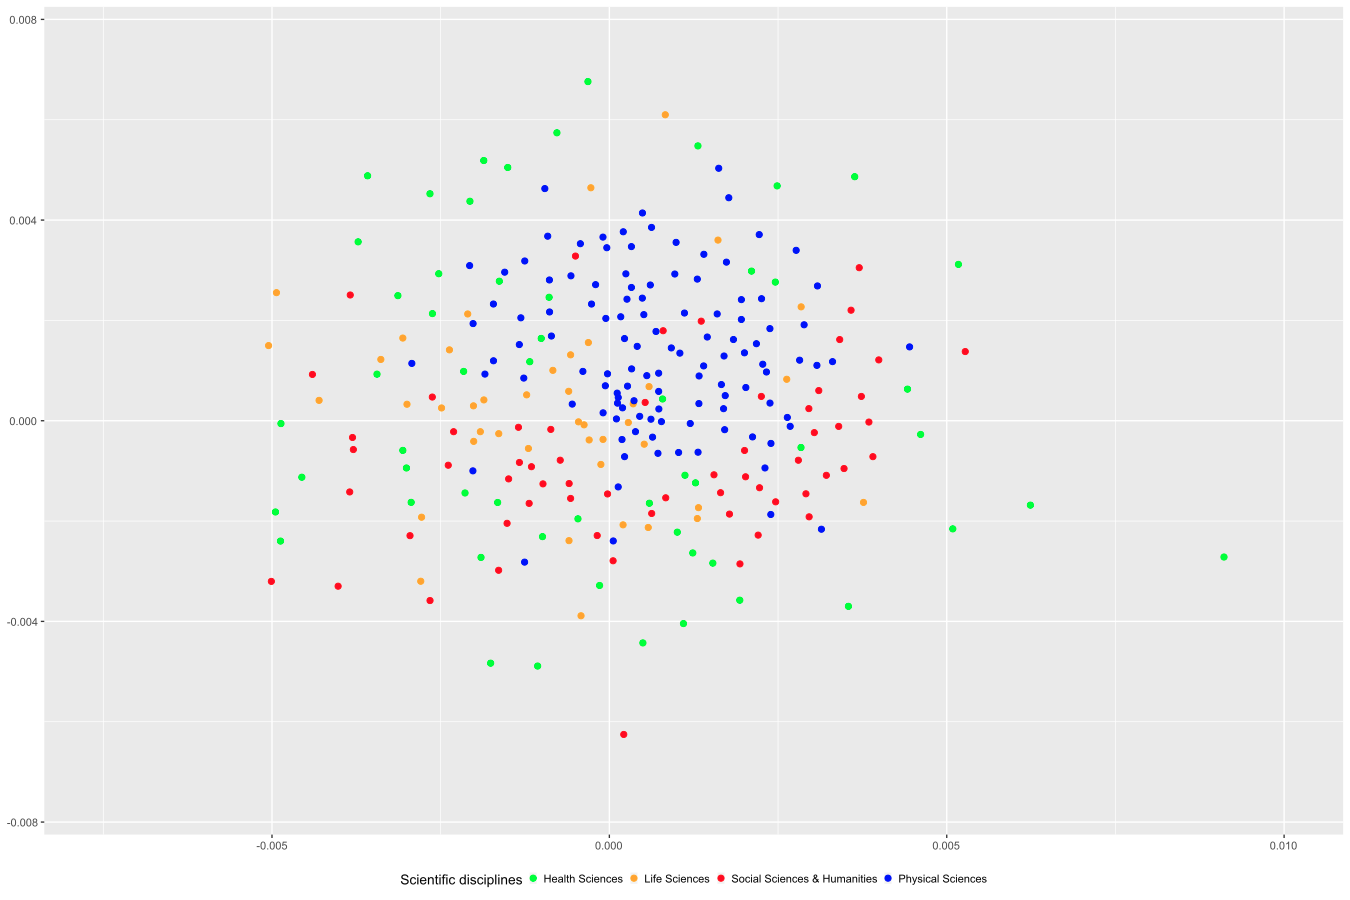

Supplement: s1 [file s1 › SF1_NMDS_318classifications.png]
